# Supplementary material for: T4-like Bacteriophages Isolated from Pig Stools Infect Yersinia pseudotuberculosis and Yersinia pestis Using LPS and OmpF as Receptors
Source: MDPI journal article supplement (doi:10.3390/v13020296), 2021-02-13
Supplement: s1 [file s1]

Supplementary data

# **T4-like bacteriophages isolated from pig stools infect *Yersinia pseudotuberculosis* and *Yersinia pestis* using LPS and OmpF as receptors**

**Mabruka Salem <sup>1,2</sup>, Maria Pajunen <sup>1</sup>, Jin Woo Jun<sup>3</sup> and Mikael Skurnik <sup>1,4\*</sup>**

<sup>1</sup> Department of Bacteriology and Immunology, Medicum, Human Microbiome Research Program, Faculty of Medicine, University of Helsinki, 00290 Helsinki, Finland; mabruka.salem@helsinki.fi; maria.pajunen@helsinki.fi; mikael.skurnik@helsinki.fi

<sup>2</sup> Department of Microbiology, Faculty of Medicine, University of Benghazi, Benghazi, Libya

<sup>3</sup> Laboratory of Aquatic Biomedicine, College of Veterinary Medicine and Research Institute for Veterinary Science, Seoul National University, Seoul 151-742, Republic of Korea; advancewoo@snu.ac.kr

<sup>4</sup> Division of Clinical Microbiology, Helsinki University Hospital, HUSLAB, 00290 Helsinki, Finland

\* Correspondence: mikael.skurnik@helsinki.fi; Tel.: +358 50 3360981

## Supplementary Tables

**Table S1.** Bacterial strains used in this work.

| Bacterial Strains                  | Serotype | Description                                                                | Reference or storage#                          |
|------------------------------------|----------|----------------------------------------------------------------------------|------------------------------------------------|
| <i>Yersinia pseudotuberculosis</i> |          |                                                                            |                                                |
| PB1                                | O:1a     | Wild type, Guinea pig isolate                                              | [1]                                            |
| 2812/79                            | O:1b     | Human isolate, Turku, Finland                                              | [2]                                            |
| YPIII/PIB1                         | O:3      | Wild type                                                                  | [3]                                            |
| PB1Δwb                             |          | Rough derivative of PB1, Km <sup>R</sup>                                   | [4]                                            |
| YpIIIΔwb                           |          | Rough derivative of YPIII, Km <sup>R</sup>                                 | Constructed in parallel with strain PB1Δwb [4] |
| YPIII/pIB1::Δwb                    | O:3      | Rough derivative of YPIII/pIB1, Km <sup>R</sup>                            | Constructed in parallel with strain PB1Δwb [4] |
| No.6                               | O:8      | Cattle isolate, New Zealand. Spontaneous rough derivative of serotype O:1b | [5,6]                                          |
| PB1-wbyM                           | O:1a     | wbyM::pSW23T-wbyM, Clm <sup>R</sup>                                        | [7]                                            |
| 15193/74-wbyM                      | O:1a     | wbyM::pSW23T-wbyM, Clm <sup>R</sup>                                        | [7]                                            |
| BB1152                             | O:1a     | Deer isolate, New Zealand                                                  | [8]                                            |
| 2884                               | O:2a     | Wild type, rabbit isolate, Italy                                           | [8]                                            |
| Hatada A                           | O:2a     | Wild type, human isolate, Japan                                            | #3530                                          |
| RD23                               | O:4b     | Wild type, raccoon dog, Japan                                              | [8]                                            |
| 1231                               | O:4b     | Wild type, rodent isolate, Russia                                          | [8]                                            |
| 6088                               | O:10     | Racoon dog, Japan                                                          | [6]                                            |
| MW387-1                            | O:10     | Mountain water, Japan                                                      | #3896                                          |
| OK5608                             | O:10     | RD, Japan                                                                  | [8]                                            |
| R80                                | O:11     | Wild rat, Japan                                                            | [6]                                            |
| MW864-1                            | O:11     | Mountain water, Japan                                                      | #3906                                          |
| MW864-2                            | O:12     | River water, Japan                                                         | [6]                                            |
| MW896-2                            | O:12     | Mountain water, Japan                                                      | #3915                                          |
| N917                               | O:13     | House rat, China                                                           | [8]                                            |
| J51                                | O:13     | Rabbit, China                                                              | [8]                                            |
| CN3                                | O:14     | Wild rat, China                                                            | [6]                                            |
| 93422                              | O:15     | Human isolate                                                              | [6]                                            |
| KHU9357                            | O:15     | Human isolate, Korea                                                       | [8]                                            |
| St.1                               | O:1a     | Human isolate, Germany                                                     | [6]                                            |
| Pa3606                             | O:1b     | Human isolate, Japan                                                       | [6]                                            |
| 208                                | O:2a     | Human isolate, Japan                                                       | [6]                                            |

|             |      |                                                                |                 |
|-------------|------|----------------------------------------------------------------|-----------------|
| 1779        | O:2b | Human isolate, Germany                                         | [6]             |
| 366         | O:2b | Human isolate, Japan                                           | [8]             |
| No.90       | O:2b | Deer isolate, New Zealand                                      | [8]             |
| 274         | O:2c | Human isolate, Japan                                           | [6]             |
| C119        | O:2c | Cat isolate, Japan                                             | [8]             |
| PC344       | O:2c | Pig isolate, Japan                                             | #3600           |
| 83          | O:3  | Human isolate                                                  | [6]             |
| R1075-1     | O:4a | Wild mice, Japan                                               | #3672           |
| 546         | O:4a | Human isolate, Russia                                          | #3675           |
| Pa3422      | O:4b | Human isolate, Japan                                           | [6]             |
| PC594       | O:4b | Pig isolate, Japan                                             | #3721           |
| PT593       | O:4b | Pig isolate, Japan                                             | #3722           |
| 204         | O:5a | Human isolate                                                  | [6]             |
| D54         | O:5a | Dog isolate, Japan                                             | [8]             |
| D79         | O:5a | Raccoon dog, Japan                                             | #3759           |
| 197         | O:5b | Human isolate, Japan                                           | [6]             |
| 491         | O:5b | Human isolate, Japan                                           | #3795           |
| OK5466      | O:5b | Raccoon dog, Japan                                             | [8]             |
| DD110       | O:6  | Human isolate, Japan                                           | [6]             |
| DC226       | O:6  | Dog isolate, Japan                                             | #3846           |
| 257         | O:7  | Dog isolate, Japan                                             | [6]             |
| MW99        | O:7  | Mountain water, Japan                                          | #3865           |
| R2093       | O:7  | Wild mice, Japan                                               | #3866           |
| 151         | O:8  | Wild rat, Japan, spontaneous rough derivative of serotype O:4a | [5,6]           |
| R670-1      | O:9  | Apodemus, Japan                                                | #3887           |
| R848        | O:9  | Mole, Japan                                                    | #3888           |
| M1-fps2-wt  | O:1a | Spontaneous phage fPS-2 resistant mutant                       | This work #6582 |
| M2-fps2-wt  | O:1a | Spontaneous phage fPS-2 resistant mutant                       | This work #6583 |
| M3-fps2-wt  | O:1a | Spontaneous phage fPS-2 resistant mutant                       | This work #6584 |
| M1-fps90-wt | O:1a | Spontaneous phage fPS-90 resistant mutant                      | This work #6585 |
| M3-fps90-wt | O:1a | Spontaneous phage fPS-90 resistant mutant                      | This work #6586 |
| M4-fps90-wt | O:1a | Spontaneous phage fPS-90 resistant mutant                      | This work #6587 |
| M5-fps90-wt | O:1a | Spontaneous phage fPS-90 resistant mutant                      | This work #6650 |
| M6-fps90-wt | O:1a | Spontaneous phage fPS-90 resistant mutant                      | This work #6651 |
| M7-fps90-wt | O:1a | Spontaneous phage fPS-90 resistant mutant                      | This work #6652 |
| M8-fps90-wt | O:1a | Spontaneous phage fPS-90 resistant mutant                      | This work #6653 |

|                          |      |                                                                             |                 |
|--------------------------|------|-----------------------------------------------------------------------------|-----------------|
| M9-fps90-wt              | O:1a | Spontaneous phage fPS-90 resistant mutant                                   | This work #6654 |
| M10-fps90-wt             | O:1a | Spontaneous phage fPS-90 resistant mutant                                   | This work #6655 |
| M1-fps65-wt              | O:1a | Spontaneous phage fPS-65 resistant mutant                                   | This work #6941 |
| M2-fps65-wt              | O:1a | Spontaneous phage fPS-65 resistant mutant                                   | This work #6942 |
| M3-fps65-wt              | O:1a | Spontaneous phage fPS-65 resistant mutant                                   | This work #6943 |
| M4-fps90-wt/pTM100-ompF  | O:1a | M4-fps90-wt complemented with wild type <i>ompF</i> gene, Clm <sup>R</sup>  | This work #6887 |
| M9-fps90-wt/pTM100-ompF  | O:1a | M9-fps90-wt complemented with wild type <i>ompF</i> gene, Clm <sup>R</sup>  | This work #6888 |
| M1-fps90-wt/pTM100-galU  | O:1a | M1-fps90-wt complemented with wild type <i>galU</i> gene, Tet <sup>R</sup>  | This work #6889 |
| M3-fps90-wt/pTM100-galU  | O:1a | M3-fps90-wt complemented with wild type <i>galU</i> gene, Tet <sup>R</sup>  | This work #6890 |
| M5-fps90-wt/pTM100-galU  | O:1a | M5-fps90-wt complemented with wild type <i>galU</i> gene, Tet <sup>R</sup>  | This work #6891 |
| M7-fps90-wt/pTM100-galU  | O:1a | M7-fps90-wt complemented with wild type <i>galU</i> gene, Tet <sup>R</sup>  | This work #6892 |
| M10-fps90-wt/pTM100-galU | O:1a | M10-fps90-wt complemented with wild type <i>galU</i> gene, Tet <sup>R</sup> | This work #6893 |
| M1-fps65-wt/pTM100-hldE  | O:1a | M1-fps65-wt complemented with wild type <i>hldE</i> gene, Tet <sup>R</sup>  | This work #7005 |
| M3-fps65-wt/pTM100-hldE  | O:1a | M3-fps65-wt complemented with wild type <i>hldE</i> gene, Tet <sup>R</sup>  | This work #7006 |

#### *Yersinia pestis*

|               |  |                                                |        |
|---------------|--|------------------------------------------------|--------|
| EV76 (#621)   |  | Attenuated vaccine strain                      | [9,10] |
| EV76 (#1289)  |  | Attenuated vaccine strain                      | [9,10] |
| EV76-c        |  | Virulence plasmid-cured derivative of EV76     | [10]   |
| KIM M YP D1   |  | Virulence plasmid-cured substrain of KIM10     | [11]   |
| KIM M YP D27  |  | Nonpigmented substrain of KIM10                | [11]   |
| KIM M YP D34  |  | Nonpigmented, pPla negative substrain of KIM10 | [11]   |
| KIM D27-ΔwaaQ |  | Deep rough, -2xHep, Km <sup>R</sup>            | [4]    |
| KIM D27-ΔwaaE |  | Deep rough, -Glc, Km <sup>R</sup>              | [4]    |
| KIM D27-ΔwaaL |  | Deep rough, -GlcNAc, Km <sup>R</sup>           | [4]    |
| KIM D27-ΔwabD |  | Deep rough, Km <sup>R</sup>                    | [4]    |

#### *Yersinia similis*

|            |      |                       |     |
|------------|------|-----------------------|-----|
| R2031      | O:11 | Apodemus, Japan       | [8] |
| N916Ysi    | O:12 | House rat, China      | [6] |
| Kuratani-2 | O:1c | Mountain water, Japan | [6] |
| R220       | O:6  | Apodemus, Japan       | [8] |
| R708       | O:9  | Wild rat, Japan       | [6] |

#### *Yersinia wautersii*

|           |      |              |     |
|-----------|------|--------------|-----|
| WP-931109 | O:15 | Water, Korea | [8] |
|-----------|------|--------------|-----|

|                               |             |                                          |                 |
|-------------------------------|-------------|------------------------------------------|-----------------|
| 51                            | O:4a        | France                                   | [6]             |
| <i>Enterobacter cloacae</i>   |             |                                          |                 |
| tk5461                        |             | Human isolate, Turku, Finland            | #804            |
| 123782                        |             | Human blood isolate, Finland             | #5508           |
| <i>Escherichia coli</i>       |             |                                          |                 |
| IHE11002                      | O:1 K:1     | Human urinary tract isolate, Finland     | [12]            |
| TKS 49                        |             | Human isolate, Turku, Finland            | #802            |
| tk5125                        |             | Human isolate, Turku, Finland            | #803            |
| tk533                         |             | Human isolate, Turku, Finland            | #810            |
| ATCC 35218                    |             | Canine, USA                              | #2102           |
| DH10B                         |             | Cloning host                             | [13]            |
| HB101                         |             | Cloning host                             | [14]            |
| ω7249                         |             | Host strain for suicide plasmid delivery | [15]            |
| <i>Klebsiella pneumoniae</i>  |             |                                          |                 |
| tk5399                        |             | Human isolate, Turku, Finland            | #808            |
| 123744                        |             | Human blood isolate, Helsinki, Finland   | #5518           |
| 123695                        |             | Human blood isolate, Helsinki, Finland   | #5529           |
| 123494                        |             | Human blood isolate, Helsinki, Finland   | #5546           |
| <i>Proteus mirabilis</i>      |             |                                          |                 |
| O27 (50/57)                   | O:27        |                                          | [16]            |
| O28 (51/57)                   | O:28        |                                          | [16]            |
| S1959                         | O:3         |                                          | Antoni Rozalski |
| <i>Providencia rettgeri</i>   |             |                                          |                 |
| 35415                         |             | Human isolate, Helsinki, Finland         | #5030           |
| 31644                         |             | Human isolate, Helsinki, Finland         | #5031           |
| 27815                         |             | Human isolate, Helsinki, Finland         | #5032           |
| <i>Salmonella enteritidis</i> |             |                                          |                 |
| SH94                          | Montevideo  |                                          | [17]            |
| ATCC 13311                    | Typhimurium |                                          | #1422           |
| 3851                          | Typhimurium | Human isolate, Oulu, Finland             | #1423           |

---

|                                    |                                  |       |
|------------------------------------|----------------------------------|-------|
| <i>Shigella</i><br>872             | Quality control strain           | #707  |
| <i>Shigella flexneri</i><br>784/83 | Quality control strain           | #519  |
| <i>Shigella sonnei</i><br>827/83   | Quality control strain           | #589  |
| <i>Morganella</i><br>61510         | Human isolate, Helsinki, Finland | #5033 |

---

**Table S2.** Plasmids used in the study.

| Plasmid            | Description                                                                                                                                        | Reference |
|--------------------|----------------------------------------------------------------------------------------------------------------------------------------------------|-----------|
| <b>pTM100-ompF</b> | Complementation plasmid with wild-type <i>ompF</i> gene of <i>Y. pseudotuberculosis</i> PB1 cloned into the BamHI site of pTM100, Clm <sup>R</sup> | This work |
| <b>pTM100-galU</b> | Complementation plasmid with wild-type <i>galU</i> gene of <i>Y. enterocolitica</i> O:3 cloned into pTM100 at EcoRI and ScaI, Tet <sup>R</sup>     | [18]      |
| <b>pRK2013</b>     | Triparental conjugation helper plasmid, Km <sup>R</sup>                                                                                            | [14]      |
| <b>pTM100-hldE</b> | Complementation plasmid with wild-type <i>hldE</i> gene of <i>Y. enterocolitica</i> O:3 cloned into pTM100, Tet <sup>R</sup> , Diaminopimelic acid | [18]      |

**Table S3.** Host range and EOP analysis of the fPS-phages on different bacterial strains (Table S1).

| Bacterial strains*           | Spot assay |        |        | Relative EOP         |                      |                      |
|------------------------------|------------|--------|--------|----------------------|----------------------|----------------------|
|                              | fPS-2      | fPS-65 | fPS-90 | fPS-2                | fPS-65               | fPS-90               |
| <i>Y. pseudotuberculosis</i> |            |        |        |                      |                      |                      |
| PB1                          | +          | +      | +      | 1                    | 1                    | 1                    |
| 2812/79                      | +          | +      | +      | $1.3 \times 10^{-6}$ | $1.6 \times 10^{-4}$ | $1.4 \times 10^{-1}$ |
| YpIII/PIB1                   | -          | +      | -      | -                    | $1.6 \times 10^{-7}$ | -                    |
| PB1 $\Delta$ wb              | +          | +      | +      | $5.7 \times 10^{-4}$ | $1.3 \times 10^{-4}$ | $1.7 \times 10^{-1}$ |
| YpIII $\Delta$ wb            | -          | +      | -      | -                    | $1.7 \times 10^{-5}$ | -                    |
| No.6                         | -          | +      | -      | -                    | $2.1 \times 10^{-4}$ | -                    |
| PB1-wbyM                     | +          | +      | +      | $7 \times 10^{-4}$   | $2 \times 10^{-4}$   | $2.6 \times 10^{-3}$ |
| 15193/74-wbyM                | +          | +      | +      | $5.7 \times 10^{-7}$ | $2.8 \times 10^{-4}$ | $6.2 \times 10^{-3}$ |
| BB1152                       | +          | +      | +      | $1.8 \times 10^{-1}$ | 0.3                  | $4.2 \times 10^{-1}$ |
| 2884                         | -          | +      | -      | -                    | 0.1                  | -                    |
| Hatada A                     | +          | +      | -      | $1.6 \times 10^{-1}$ | 1                    | -                    |
| RD23                         | -          | +      | -      | -                    | $0.4 \times 10^{-1}$ | -                    |
| 1231                         | +          | +      | +      | $1.6 \times 10^{-6}$ | $0.7 \times 10^{-3}$ | $2.1 \times 10^{-2}$ |
| 6088                         | -          | -      | -      | -                    | -                    | -                    |
| MW387-1                      | -          | -      | -      | -                    | -                    | -                    |
| OK5608                       | -          | +      | -      | -                    | ND**                 | -                    |
| R80                          | -          | -      | -      | -                    | --                   | -                    |
| MW864-1                      | -          | -      | -      | -                    | -                    | -                    |
| MW864-2                      | +          | -      | +      | ND                   | -                    | ND                   |
| MW896-2                      | -          | -      | -      | -                    | -                    | -                    |
| N917                         | +          | +      | +      | ND                   | ND                   | ND                   |
| J51                          | -          | -      | +      | -                    | -                    | ND                   |
| CN3                          | -          | +      | -      | -                    | ND                   | -                    |
| 93422                        | -          | -      | -      | -                    | -                    | -                    |
| KHU9357                      | -          | +      | -      | -                    | ND                   | -                    |
| St.1                         | +          | +      | +      | ND                   | ND                   | ND                   |
| Pa3606                       | -          | -      | -      | -                    | -                    | -                    |
| 208                          | +          | +      | -      | ND                   | ND                   | -                    |
| 1779                         | -          | -      | -      | -                    | -                    | -                    |



|               |   |   |   |    |    |    |
|---------------|---|---|---|----|----|----|
| 366           | + | + | - | ND | ND | -  |
| No.90         | - | - | - | -  | -  | -  |
| 274           | - | + | - | -  | ND | -  |
| C119          | + | + | - | ND | ND | -  |
| PC344         | - | + | - | -  | ND | -  |
| 83            | - | - | - | -  | -  | -  |
| YPH/pIB1::Δwb | - | + | - | -  | ND | -  |
| R1075-1       | + | + | + | ND | ND | ND |
| 546           | - | + | - | -  | ND | -  |
| Pa3422        | - | + | - | -  | ND | -  |
| PC594         | + | + | + | ND | ND | ND |
| PT593         | + | + | + | ND | ND | ND |
| 204           | + | + | + | ND | ND | ND |
| D54           | - | - | - | -  | -  | -  |
| D79           | - | - | - | -  | -  | -  |
| 197           | + | + | + | ND | ND | ND |
| 491           | - | - | - | -  | -  | -  |
| OK5466        | + | + | + | ND | ND | ND |
| DD110         | - | - | - | -  | -  | -  |
| DC226         | - | - | - | -  | -  | -  |
| 257           | + | + | + | ND | ND | ND |
| MW99          | - | - | - | -  | -  | -  |
| R2093         | - | - | - | -  | -  | -  |
| 151           | - | - | - | -  | -  | -  |
| R670-1        | - | - | - | -  | -  | -  |
| R848          | - | - | - | -  | -  | -  |

*Y. pestis*

|           |   |   |   |   |                        |   |
|-----------|---|---|---|---|------------------------|---|
| EV76      | - | + | - | - | 1.3 × 10 <sup>-4</sup> | - |
| EV76-c    | - | + | - | - | ND                     | - |
| D1        | - | + | - | - | ND                     | - |
| D34       | - | + | - | - | ND                     | - |
| D27       | - | + | - | - | 2.6 × 10 <sup>-5</sup> | - |
| D27-ΔwaaQ | - | + | - | - | 2.6 × 10 <sup>-5</sup> | - |
| D27-ΔwaaE | - | + | - | - | 0.3 × 10 <sup>-5</sup> | - |
| D27-ΔwaaL | - | + | - | - | 2.2 × 10 <sup>-5</sup> | - |
| D27-ΔwabD | - | + | - | - | 2.3 × 10 <sup>-5</sup> | - |

*Y. similis*

|            |   |   |   |    |   |    |
|------------|---|---|---|----|---|----|
| R2031      | - | - | - | -  | - | -  |
| N916Ysi    | + | - | + | ND | - | ND |
| Kuratani-2 | - | - | - | -  | - | -  |
| R220       | - | - | - | -  | - | -  |
| R708       | - | - | - | -  | - | -  |

*Y. wautersii*

|           |   |   |   |   |   |   |
|-----------|---|---|---|---|---|---|
| WP-931109 | - | - | - | - | - | - |
| 51        | - | - | - | - | - | - |

*E. cloacae*

|        |   |   |   |   |   |   |
|--------|---|---|---|---|---|---|
| tk5461 | - | - | - | - | - | - |
| 123782 | - | - | - | - | - | - |

*E. coli*

|            |   |   |   |                      |                      |                    |
|------------|---|---|---|----------------------|----------------------|--------------------|
| IHE 11002  | + | + | + | $0.2 \times 10^{-3}$ | $1.5 \times 10^{-4}$ | $4 \times 10^{-1}$ |
| TKS 49     | - | - | - | -                    | -                    | -                  |
| tk5125     | - | - | - | -                    | -                    | -                  |
| tk533      | - | - | - | -                    | -                    | -                  |
| ATCC 35218 | - | - | - | -                    | -                    | -                  |

*K. pneumoniae*

|        |   |   |   |   |   |   |
|--------|---|---|---|---|---|---|
| tk5399 | - | - | - | - | - | - |
| 123744 | - | - | - | - | - | - |
| 123695 | - | - | - | - | - | - |
| 123494 | - | - | - | - | - | - |

*P. mirabilis*

|             |   |   |   |   |   |   |
|-------------|---|---|---|---|---|---|
| O27 (50/57) | - | - | - | - | - | - |
| O28 (51/57) | - | - | - | - | - | - |
| S1959       | - | - | - | - | - | - |

*P. rettgeri*

|       |   |   |   |   |   |   |
|-------|---|---|---|---|---|---|
| 35415 | - | - | - | - | - | - |
| 31644 | - | - | - | - | - | - |
| 27815 | - | - | - | - | - | - |

*S. enteritidis*

|            |   |   |   |   |   |   |
|------------|---|---|---|---|---|---|
| SH94       | - | - | - | - | - | - |
| ATCC 13311 | - | - | - | - | - | - |
| 3851       | - | - | - | - | - | - |

*Shigella*

|        |   |   |   |   |   |   |
|--------|---|---|---|---|---|---|
| 872    | - | - | - | - | - | - |
| 784/83 | - | - | - | - | - | - |

*Morganella*

|       |   |   |   |   |   |   |
|-------|---|---|---|---|---|---|
| 61510 | - | - | - | - | - | - |
|-------|---|---|---|---|---|---|

---

\* The bacterial species and serotypes are mentioned in details in Table S1.

\*\* ND (Not done).

**Table S4.** Comparison of the gene products of the fPS-phages with the corresponding T4 gene products. Identity % compared to gene product of FPS-2 is given in parenthesis for the other phages.

| Predicted function                                           | fPS-2 | <i>n</i> aa | fPS-65                 | <i>n</i> aa | fPS-90        | <i>n</i> aa | T4 phage       | Gene product in T4                                      |
|--------------------------------------------------------------|-------|-------------|------------------------|-------------|---------------|-------------|----------------|---------------------------------------------------------|
| rIIA lysis inhibitor                                         | Gp001 | 725         | Gp001 (99%)            | 725         | Gp001 (97.6%) | 733         | rIIA (98.2%)   | rIIA protector from prophage-induced early lysis        |
| rIIA lysis inhibitor                                         | Gp002 | 67          | Gp002 (100%)           | 67          | Gp002 (100%)  | 67          | rIIA.1 (98.5%) | rIIA.1 hypothetical protein                             |
|                                                              |       |             |                        |             |               |             | Gp60           | topoisomerase II, large subunit, C-terminal region      |
|                                                              |       |             |                        |             |               |             | Gp60.1         | hypothetical protein                                    |
| DNA gyrase (Phage DNA topoisomerase large subunit in fPS-90) | Gp003 | 605         | Gp003 (100%)           | 605         | Gp004 (97%)   | 265         | Gp39 (98.3%)   | gp39 topoisomerase II, large subunit, N-terminal region |
| homing endonuclease                                          |       |             |                        |             | Gp003         | 605         |                |                                                         |
| Phage protein                                                | Gp004 | 86          | Gp004 (97%)            | 87          | Gp005 (97.6%) | 86          | Gp39.1 (100%)  | hypothetical protein                                    |
|                                                              |       |             |                        |             |               |             | Gp39.2         | gp39.2 hypothetical protein                             |
| Phage protein                                                | Gp005 | 141         | Gp005                  | 123         | Gp007 (90%)   | 58          | goF (92.2%)    | goF mRNA metabolism modulator                           |
| Phage protein                                                |       |             | Gp006                  | 58          | Gp006 (98.2%) | 139         |                |                                                         |
| Phage protein                                                |       |             | Gp007 (75.9%) to Gp005 | 137         |               |             |                |                                                         |
| cef modifier of suppressor tRNAs                             | Gp006 | 71          | Gp008 (98.6%)          | 71          | Gp008 (98.5%) | 71          | cef (98.5%)    | cef modifier of suppressor tRNAs                        |
| hypothetical protein                                         | Gp007 | 37          |                        |             | Gp009 (91.8%) | 37          |                |                                                         |
| Transcriptional regulator                                    | Gp008 | 165         | Gp009 (90.3%)          | 163         | Gp010 (90.3%) | 162         | MotB (88.4%)   | MotB modifier of transcription                          |
| Transcriptional regulator                                    | Gp009 | 180         | Gp010 (74.5%)          | 167         | Gp011 (94.4%) | 180         | MotB.1 (52.1%) | MotB.1 hypothetical protein                             |
| Transcriptional regulator                                    | Gp010 | 170         | Gp011 (92.3%)          | 170         | Gp012 (63.7%) | 167         | MotB.2 (59.7%) | MotB.2 hypothetical protein                             |
| DexA exonuclease A                                           | Gp011 | 227         | Gp012 (99%)            | 227         | Gp013 (99.5%) | 227         | DexA (99.5%)   | DexA exonuclease A                                      |
| Phage exonuclease                                            | Gp012 | 80          | Gp013 (92.5%)          | 80          | Gp014 (98.7%) | 80          | DexA.1 (91.2%) | DexA.1 hypothetical protein                             |
| Phage exonuclease                                            | Gp013 | 81          | Gp014 (96.3%)          | 81          | Gp015 (90.1%) | 81          | DexA.2 (95%)   | DexA.2 hypothetical protein                             |
| Phage protein                                                | Gp014 | 86          | Gp015 (98.8%)          | 86          | Gp016 (97.6%) | 86          |                |                                                         |
| DNA helicase                                                 | Gp015 | 439         | Gp016 (99.3%)          | 439         | Gp017 (99.3%) | 439         | dda (97.7%)    | DNA helicase                                            |
| Phage protein                                                | Gp016 | 103         | Gp017 (97%)            | 103         | Gp018 (91.2%) | 103         | Dda.1 (98%)    | Dda.1 hypothetical protein                              |
| Phage anti-termination                                       | Gp017 | 251         | Gp018 (98.3%)          | 248         | Gp019 (98.3%) | 248         | Srd (98.3%)    | Srd anti-sigma factor                                   |
| ADP-ribosyltransferase modA                                  | Gp018 | 200         | Gp019 (99%)            | 200         | Gp020 (98.5%) | 200         | ModA (97.5%)   | ModA RNA polymerase ADP-ribosylase                      |

|                                             |       |     |               |     |               |     |                |                                              |
|---------------------------------------------|-------|-----|---------------|-----|---------------|-----|----------------|----------------------------------------------|
| ADP-ribosyltransferase modA                 | Gp019 | 207 | Gp020 (96.6%) | 207 | Gp021 (98.5%) | 207 | ModB (95.6%)   | ModB ADP-ribosylase                          |
| periplasmic molybdenum-binding protein ModA | Gp020 | 60  | Gp021 (98.3%) | 60  | Gp022 (98.3%) | 60  | ModA.2 (96.6%) | ModA.2 hypothetical protein                  |
| periplasmic molybdenum-binding protein ModA | Gp021 | 156 | Gp022 (96%)   | 156 | Gp023 (94.8%) | 156 | ModA.3 (95.5%) | ModA.3 hypothetical protein                  |
| periplasmic molybdenum-binding protein ModA | Gp022 | 50  | Gp023 (98%)   | 54  | Gp024 (98%)   | 54  | ModA.4 (98%)   | ModA.4 hypothetical protein                  |
| Srh transcription modulator                 | Gp023 | 67  | Gp024 (100%)  | 67  | Gp025 (97%)   | 67  | Srh (97%)      | Srh transcription modulator                  |
| Phage protein                               | Gp024 | 161 | Gp025 (98%)   | 161 | Gp026 (76.4%) | 161 | Mrh (97.5%)    | Mrh transcription modulator under heat shock |
| Phage protein                               | Gp025 | 113 | Gp026 (97%)   | 113 | Gp027 (94.3%) | 164 | Mrh.1 (95.7%)  | Mrh.1 hypothetical protein                   |
| Phage protein                               | Gp026 | 68  | Gp027 (100%)  | 68  | Gp028 (100%)  | 68  | Mrh.2 (98.5%)  | Mrh.2 hypothetical protein                   |
| Phage capsid and scaffold                   | Gp027 | 78  | Gp028 (47%)   | 81  | Gp029 (45.9%) | 80  | Soc (47.3%)    | Soc small outer capsid protein               |
| hypothetical protein                        | Gp028 | 278 | Gp029         | 69  |               |     |                |                                              |
| phage protein                               |       |     | Gp030         | 64  |               |     |                |                                              |
|                                             |       |     |               |     |               |     | SegF           | SegF homing endonuclease                     |
| dCTP pyrophosphatase                        | Gp029 | 172 | Gp031 (68.6%) | 172 | Gp030 (96.5%) | 172 | Gp56 (75.5%)   | gp56 dCTPase                                 |
| Adenine-specific methyltransferase          |       |     | Gp032         | 259 |               |     | Dam (97.6%)    | DNA adenine methyltransferase                |
| Phage-associated homing endonuclease        | Gp030 | 216 |               |     | Gp031 (99%)   | 216 |                |                                              |
| Phage protein                               | Gp031 | 66  | Gp034 (92%)   | 186 | Gp032 (93.9%) | 66  |                |                                              |
| hypothetical protein                        |       |     | Gp033         | 66  |               |     |                |                                              |
| DNA primase, DNA helicase                   | Gp032 | 342 | Gp035 (99%)   | 342 | Gp033 (99.4%) | 342 | Gp61 (99.1%)   | gp61 DNA primase subunit                     |
| Phage protein                               | Gp033 | 54  | Gp036 (98%)   | 54  | Gp034 (98.1%) | 54  | Gp61.1 (98.1%) | gp61.1 hypothetical protein                  |
| Phage protein                               | Gp034 | 208 | Gp037 (99%)   | 157 | Gp035 (100%)  | 208 | Gp61.2 (99%)   | gp61.2 hypothetical protein                  |
| spackle periplasmic protein                 | Gp035 | 97  | Gp038 (96%)   | 97  | Gp036 (96.9%) | 97  | Sp (98.9%)     | spackle periplasmic protein                  |
| Phage protein                               | Gp036 | 85  | Gp039 (98.8%) | 85  | Gp037 (95.2%) | 85  | Gp61.4 (96.4%) | gp61.4 hypothetical protein                  |

|                                                                                |       |     |               |     |               |     |               |                                                             |
|--------------------------------------------------------------------------------|-------|-----|---------------|-----|---------------|-----|---------------|-------------------------------------------------------------|
| discriminator of mRNA degradation                                              | Gp037 | 60  | Gp040 (98%)   | 60  | Gp038 (98.3%) | 60  | Dmd (100%)    | Dmd discriminator of mRNA degradation                       |
| DNA primase/helicase                                                           | Gp038 | 475 | Gp041 (99.7%) | 475 | Gp039 (99.7%) | 475 | Gp41 (99.7%)  | gp41 DNA primase-helicase subunit                           |
| Phage capsid and scaffold                                                      | Gp039 | 114 | Gp042 (100%)  | 114 | Gp040 (100%)  | 114 | Gp40 (100%)   | gp40 head vertex assembly chaperone                         |
| Phage recombination protein                                                    | Gp040 | 393 | Gp043 (99.7%) | 393 | Gp041 (99.7%) | 393 | UvsX (90.2%)  | UvsX RecA-like recombination protein                        |
| Glucosyl transferase                                                           | Gp041 | 280 | Gp044 (98.5%) | 280 | Gp042 (98.9%) | 280 | SegA<br>B-gt  | SegA homing endonuclease<br>beta glucosyl transferase       |
| hypothetical protein                                                           | Gp042 | 213 |               |     |               |     |               |                                                             |
| Deoxycytidylate 5-hydroxymethyltransferase                                     | Gp043 | 246 | Gp045 (93%)   | 246 | Gp043 (93%)   | 246 | Gp42 (93%)    | gp42 dCMP hydroxymethylase                                  |
| Phage immunity                                                                 | Gp044 | 49  | Gp046 (100%)  | 83  | Gp044 (100%)  | 83  | Imm (97.9%)   | Imm immunity to superinfection membrane protein             |
| Phage immunity                                                                 | Gp045 | 126 | Gp047 (98.4%) | 126 | Gp045 (99.2%) | 126 | Imm.1 (100%)  | Imm.1 hypothetical predicted membrane protein               |
| hypothetical protein                                                           |       |     | Gp048         | 78  | Gp046 (93.5%) | 78  |               |                                                             |
| DNA polymerase                                                                 | Gp046 | 898 | Gp049 (99.4%) | 898 | Gp047 (99.6%) | 898 | Gp43 (99.5%)  | gp43 DNA polymerase                                         |
| Phage protein                                                                  |       |     | Gp050         | 73  | Gp048 (95.8%) | 73  |               |                                                             |
| Phage endoribonulcease translational repressor of early genes, regA            | Gp047 | 122 | Gp051 (100%)  | 122 | Gp049 (100%)  | 122 | RegA (100%)   | RegA translational repressor protein                        |
| Phage DNA polymerase clamp loader subunit Gp62                                 | Gp048 | 187 | Gp052 (92.4%) | 187 | Gp050 (98.4%) | 187 | Gp62 (98.4%)  | gp62 clamp loader subunit, DNA polymerase accessory protein |
| Replication factor C small subunit / Phage DNA polymerase clamp loader subunit | Gp049 | 319 | Gp053 (99.6%) | 319 | Gp051 (99.6%) | 319 | Gp44 (100%)   | gp44 clamp loader subunit, DNA polymerase accessory protein |
| Sliding clamp DNA polymerase accessory protein                                 | Gp050 | 228 | Gp054 (99%)   | 228 | Gp052 (99.1%) | 228 | Gp45 (98.6%)  | gp45 sliding clamp, DNA polymerase accessory protein        |
| RNA polymerase                                                                 | Gp051 | 129 | Gp055 (100%)  | 129 | Gp053 (98.4%) | 129 | RpbA (100%)   | RpbA RNA polymerase binding protein, function unknown       |
| Phage protein                                                                  | Gp052 | 62  | Gp056 (98%)   | 62  | Gp054 (98.3%) | 62  | Gp45.2 (100%) | gp45.2 conserved hypothetical protein                       |

|                                                                  |       |     |               |     |               |     |                |                                                          |
|------------------------------------------------------------------|-------|-----|---------------|-----|---------------|-----|----------------|----------------------------------------------------------|
| Phage recombination-related endonuclease Gp46                    | Gp053 | 560 | Gp057 (95.7%) | 560 | Gp055 (95.2%) | 546 | Gp46 (99.8%)   | gp46 recombination endonuclease subunit                  |
| Phage protein                                                    | Gp054 | 68  | Gp058 (98.5%) | 68  | Gp056 (97%)   | 68  | Gp46.1 (100%)  | gp46.1 hypothetical protein                              |
| Phage protein                                                    | Gp055 | 87  | Gp059 (99.6%) | 87  | Gp057 (97.7%) | 87  | Gp46.2 (97.7%) | gp46.2 hypothetical protein                              |
| Phage recombination-related endonuclease Gp47                    | Gp056 | 339 | Gp060 (96.4%) | 339 | Gp058 (99.1%) | 339 | Gp47 (98.8%)   | gp47 recombination endonuclease subunit                  |
| hypothetical protein                                             |       |     |               |     | Gp059         | 207 | Gp47.1         | gp47.1 hypothetical predicted membrane protein           |
| alpha glucosyl transferase                                       | Gp057 | 400 | Gp061 (98%)   | 400 | Gp060 (90.5%) | 400 | a-gt (91%)     | alpha glucosyl transferase                               |
| Phage-associated homing endonuclease                             | Gp058 | 227 |               |     |               |     | MobB (98.6%)   | MobB homing endonuclease                                 |
| Phage protein                                                    | Gp059 | 57  | Gp062 (93%)   | 57  | Gp061 (91.2%) | 57  | a-gt.2 (90.5%) | a-gt.2 hypothetical protein                              |
| Phage protein                                                    | Gp060 | 67  | Gp063 (98.5%) | 67  | Gp062 (100%)  | 67  | a-gt.3 (98.5%) | a-gt.3 hypothetical protein                              |
| Phage protein                                                    | Gp061 | 105 | Gp064 (100%)  | 105 | Gp063 (100%)  | 105 | a-gt.4 (100%)  | a-gt.4 conserved hypothetical protein                    |
| Phage protein                                                    | Gp062 | 62  | Gp065 (100%)  | 62  | Gp064 (100%)  | 62  | a-gt.5 (100%)  | a-gt.5 hypothetical protein                              |
| T4-like phage RNA polymerase sigma factor for late transcription | Gp063 | 185 | Gp066 (100%)  | 185 | Gp065 (100%)  | 185 | Gp55 (100%)    | gp55 Sigma factor for T4 late transcription              |
| Phage protein                                                    | Gp064 | 89  | Gp067 (100%)  | 89  | Gp066 (100%)  | 89  |                |                                                          |
| Phage protein                                                    | Gp065 | 71  | Gp068 (100%)  | 71  | Gp067 (100%)  | 71  | Gp55.1 (94.3%) | gp55.1 hypothetical protein                              |
| Phage protein                                                    | Gp066 | 108 | Gp069 (98%)   | 108 | Gp068 (98%)   | 108 | Gp55.2 (99%)   | gp55.2 hypothetical protein                              |
| Phage protein                                                    | Gp067 | 66  | Gp070 (75.7%) | 66  | Gp069 (93.9%) | 66  | Gp55.3 (75.7%) | gp55.3 hypothetical protein                              |
| Phage protein                                                    | Gp068 | 43  | Gp071 (95%)   | 43  | Gp070 (95.3%) | 43  | Gp55.4 (97.6%) | gp55.4 conserved hypothetical protein                    |
| Phage protein                                                    | Gp069 | 97  | Gp072 (97%)   | 97  | Gp071 (100%)  | 97  | Gp55.5 (100%)  | gp55.5 conserved protein of unknown function             |
| Phage protein                                                    | Gp070 | 60  | Gp073 (100%)  | 60  | Gp072 (98.3%) | 60  | Gp55.6 (85%)   | gp55.6 conserved hypothetical protein                    |
| Glutaredoxin                                                     | Gp071 | 107 | Gp074 (95%)   | 107 | Gp073 (96%)   | 102 | NrdH (96%)     | NrdH glutaredoxin                                        |
| Phage protein                                                    | Gp072 | 87  | Gp075 (98.8%) | 103 |               |     |                |                                                          |
| Phage protein                                                    | Gp073 | 71  | Gp076 (100%)  | 71  | Gp074 (94.2%) | 70  | Gp55.8 (95.7%) | gp55.8 conserved hypothetical predicted membrane protein |
| Phage protein                                                    | Gp074 | 37  | Gp077 (100%)  | 37  | Gp075 (100%)  | 37  |                |                                                          |

|                                                                       |       |     |               |     |               |     |                                    |                                                                                                            |
|-----------------------------------------------------------------------|-------|-----|---------------|-----|---------------|-----|------------------------------------|------------------------------------------------------------------------------------------------------------|
| Ribonucleotide reductase of class III (anaerobic), activating protein | Gp075 | 130 | Gp078 (96.9%) | 156 | Gp076 (98.4%) | 156 | NrdG (77.6%)                       | NrdG anaerobic NTP reductase, small subunit                                                                |
| Phage-associated homing endonuclease                                  | Gp076 | 244 |               |     |               |     |                                    |                                                                                                            |
| Ribonucleotide reductase of class III (anaerobic), large subunit      | Gp077 | 424 | Gp079 (96.9%) | 605 | Gp077 (96.6%) | 605 | MobC<br>NrdD (97.1%)               | MobC homing endonuclease<br>NrdD anaerobic NTP reductase, large subunit                                    |
| Phage-associated homing endonuclease                                  | Gp078 | 258 |               |     |               |     | I-TevII (99.2%)                    | I-TevII homing endonuclease                                                                                |
| Ribonucleotide reductase of class III (anaerobic), large subunit      | Gp079 | 181 |               |     |               |     | NrdD (83.8%)                       | NrdD anaerobic NTP reductase, large subunit                                                                |
| Phage-associated homing endonuclease                                  | Gp080 | 273 |               |     | Gp078 (100%)  | 273 |                                    |                                                                                                            |
| Phage endonuclease                                                    | Gp081 | 157 | Gp080 (98.7%) | 157 | Gp079 (99.3%) | 157 | Gp49 (100%)                        | gp49 EndoVII packaging and recombination endonuclease VII                                                  |
| Pin protease inhibitor                                                | Gp082 | 161 | Gp081 (96.8%) | 161 | Gp080 (98.1%) | 161 | Pin (96.2%)                        | Pin protease inhibitor                                                                                     |
| Phage protein                                                         | Gp083 | 55  | Gp082 (88%)   | 51  | Gp081 (96.3%) | 55  | Gp49.1 (88.2%)<br>Gp49.2<br>Gp49.3 | gp49.1 conserved protein of unknown function<br>gp49.2 hypothetical protein<br>gp49.3 hypothetical protein |
| Nucleotide reductase subunit C                                        |       |     | Gp083         | 106 |               |     |                                    |                                                                                                            |
| Phage protein                                                         | Gp084 | 64  | Gp084 (89%)   | 56  | Gp082 (90.6%) | 64  |                                    |                                                                                                            |
| Phage protein                                                         | Gp085 | 71  | Gp085 (98%)   | 71  | Gp083 (100%)  | 71  |                                    |                                                                                                            |
| Thioredoxin, phage-associated                                         | Gp086 | 87  | Gp086 (100%)  | 87  | Gp084 (100%)  | 87  | NrdC (100%)                        | NrdC thioredoxin                                                                                           |
| Thioredoxin, phage-associated                                         | Gp087 | 80  | Gp087 (98.7%) | 80  | Gp085 (100%)  | 80  | NrdC.1 (98.7%)                     | NrdC.1 conserved hypothetical protein                                                                      |
| Thioredoxin, phage-associated                                         | Gp088 | 108 | Gp088 (78.6%) | 98  | Gp086 (98.1%) | 129 | NrdC.2 (74.6%)                     | NrdC.2 conserved hypothetical protein                                                                      |
| Thioredoxin, phage-associated                                         | Gp089 | 309 | Gp089 (61.9%) | 308 | Gp087 (97%)   | 309 | NrdC.3 (60.6%)                     | NrdC.3 conserved hypothetical protein                                                                      |
| Thioredoxin, phage-associated                                         |       |     |               |     | Gp088         | 333 | NrdC.4 (90%)                       | NrdC.4 conserved hypothetical protein                                                                      |



|                                     |       |     |               |       |               |                |                                                                          |
|-------------------------------------|-------|-----|---------------|-------|---------------|----------------|--------------------------------------------------------------------------|
| Thioredoxin, phage-associated       |       |     |               | Gp089 | 279           | NrdC.5 (94.2%) | NrdC.5 conserved hypothetical protein                                    |
| Thioredoxin, phage-associated       |       |     |               | Gp090 | 60            |                |                                                                          |
| Thioredoxin, phage-associated       | Gp090 | 295 | Gp092 (97.9%) | 295   | Gp091 (97.2%) | 295            | NrdC.6 (97.3%) NrdC.6 conserved hypothetical protein                     |
| Thioredoxin, phage-associated       | Gp091 | 135 | Gp093 (96.2%) | 134   | Gp092 (95.4%) | 134            | NrdC.7 (90.2%) NrdC.7 conserved hypothetical, predicted membrane protein |
| Thioredoxin, phage-associated       | Gp092 | 175 | Gp094 (100%)  | 175   | Gp093 (100%)  | 175            | NrdC.8 (98.8%) NrdC.8 conserved hypothetical protein                     |
| Thioredoxin, phage-associated       | Gp093 | 100 | Gp095 (97%)   | 100   | Gp094 (96%)   | 100            | NrdC.9 (98%) NrdC.9 conserved hypothetical protein                       |
| Thioredoxin, phage-associated       | Gp094 | 344 | Gp096 (99.6%) | 322   | Gp095 (99.3%) | 322            | NrdC.10 (99%) NrdC.10 conserved hypothetical protein                     |
| hypothetical protein                |       |     | Gp097         | 87    | Gp096 (97.7%) | 87             |                                                                          |
| hypothetical protein                |       |     | Gp098         | 49    | Gp097 (100%)  | 49             |                                                                          |
| Thioredoxin, phage-associated       |       |     | Gp099         | 81    |               |                |                                                                          |
| Thioredoxin, phage-associated       | Gp095 | 336 | Gp100 (99.6%) | 253   | Gp098 (98.8%) | 336            | NrdC.11 (97.9%) NrdC.11 conserved hypothetical protein                   |
| hypothetical protein                | Gp096 | 73  | Gp101 (93.4%) | 73    | Gp099 (94.5%) | 73             |                                                                          |
|                                     |       |     |               |       |               | MobD           | MobD homing endonuclease                                                 |
| Phage protein                       | Gp097 | 173 | Gp102 (96.5%) | 173   | Gp100 (95.3%) | 173            | MobD.1 (25.1%) MobD.1 conserved hypothetical protein                     |
| Phage protein                       | Gp098 | 181 | Gp103 (93.8%) | 185   | Gp101 (83.3%) | 102            | MobD.1 (82.3%) MobD.1 conserved hypothetical protein                     |
|                                     |       |     |               | Gp102 | 43            |                |                                                                          |
|                                     |       |     |               |       |               | MobD.2         | MobD.2 conserved hypothetical protein                                    |
| Phage protein                       | Gp099 | 57  | Gp104 (96.4%) | 57    | Gp103 (98.2%) | 57             | MobD.2a (89.4%) MobD.2a hypothetical protein                             |
| Phage protein                       | Gp100 | 64  | Gp105 (96.8%) | 64    | Gp104 (95.3%) | 64             | MobD.3 (93.7%) MobD.3 hypothetical protein                               |
| Phage protein                       | Gp101 | 67  | Gp106 (85%)   | 67    | Gp105 (98.5%) | 67             | MobD.4 (74.6%) MobD.4 hypothetical protein                               |
| Phage protein                       | Gp102 | 62  | Gp107 (96.7%) | 62    | Gp106 (100%)  | 62             | MobD.5 (100%) MobD.5 hypothetical protein                                |
| Phage protein                       | Gp103 | 128 | Gp108 (100%)  | 128   | Gp107 (100%)  | 106            | MobD.6 (100%) MobD.6 hypothetical protein                                |
| Phage rI lysis inhibition regulator | Gp104 | 97  | Gp109 (96.9%) | 97    | Gp108 (96.9%) | 97             | rI (100%) rI lysis inhibition regulator, membrane protein                |
| Phage protein                       | Gp105 | 70  | Gp110 (100%)  | 70    | Gp109 (98.5%) | 70             | rI.1 (100%) rI.1 conserved hypothetical protein                          |

|                                             |       |     |               |     |               |     |                      |                                                                                            |
|---------------------------------------------|-------|-----|---------------|-----|---------------|-----|----------------------|--------------------------------------------------------------------------------------------|
| Thymidine kinase                            | Gp106 | 193 | Gp111 (99.4%) | 193 | Gp110 (98.4%) | 193 | Tk (98.4%)<br>Tk.1   | Tk thymidine kinase<br>Tk.1 conserved hypothetical protein                                 |
| Phage protein                               | Gp107 | 61  | Gp112 (98.3%) | 61  | Gp111 (96.7%) | 61  | Tk.2 (98.4%)         | Tk.2 conserved hypothetical protein                                                        |
| Phage protein                               | Gp108 | 57  | Gp113 (100%)  | 57  | Gp112 (96.4%) | 57  |                      |                                                                                            |
| Phage protein                               | Gp109 | 68  | Gp114 (98.5%) | 68  | Gp113 (89.7%) | 68  |                      |                                                                                            |
| Phage protein                               | Gp110 | 70  | Gp115 (95.7%) | 70  | Gp114 (100%)  | 70  | Tk.3 (95.7%)         | Tk.3 conserved hypothetical protein                                                        |
| Phage protein                               | Gp111 | 159 | Gp116 (58%)   | 155 | Gp115 (99.2%) | 130 | Tk.4 (58%)           | Tk.4 conserved hypothetical protein                                                        |
| Valyl-tRNA synthetase                       | Gp112 | 115 | Gp117 (97.3%) | 113 | Gp116 (97.3%) | 113 | Vs (99.1%)           | Vs valyl-tRNA synthetase modifier                                                          |
| T4-like phage protein                       | Gp113 | 181 | Gp118 (99.4%) | 181 | Gp117 (99.4%) | 181 | Vs.1 (99.4%)         | Vs.1 conserved hypothetical protein                                                        |
| Endoribonuclease, RegB protein              | Gp114 | 153 | Gp119 (99.3%) | 153 | Gp118 (98.6%) | 153 | RegB (99.3%)         | RegB site-specific RNA endonuclease                                                        |
| Phage protein                               | Gp115 | 92  | Gp120 (96.7%) | 92  | Gp119 (98.9%) | 92  | Vs.3 (97.8%)         | Vs.3 conserved hypothetical protein                                                        |
| Phage protein                               | Gp116 | 88  | Gp121 (88.6%) | 88  | Gp120 (94.3%) | 88  | Vs.4 (94.3%)         | Vs.4 conserved hypothetical protein                                                        |
| Phage protein                               | Gp117 | 73  | Gp122 (98.6%) | 73  | Gp121 (97.2%) | 73  | Vs.5 (88.8%)         | Vs.5 conserved hypothetical protein                                                        |
| Pyruvate formate-lyase                      | Gp118 | 120 | Gp123 (99%)   | 120 | Gp122 (98.3%) | 120 | Vs.6 (98.3%)         | Vs.6 conserved hypothetical protein                                                        |
| Phage protein                               | Gp119 | 109 | Gp124 (98%)   | 54  | Gp123 (100%)  | 54  | Vs.7 (98.1%)         | Vs.7 conserved hypothetical protein                                                        |
| Phage protein                               | Gp120 | 179 | Gp125 (90.5%) | 179 | Gp124 (88.8%) | 179 | Vs.8 (92.1%)<br>DenV | Vs.8 conserved hypothetical protein<br>DenV endonuclease V, N-glycosylase UV repair enzyme |
| Phage protein                               | Gp121 | 157 | Gp126         | 138 | Gp125 (98.7%) | 157 | IpII (31.1%)         | IpII internal head protein                                                                 |
| Phage endonuclease                          |       |     |               |     | Gp126         | 138 | IpIII                | IpIII internal head protein                                                                |
| T4-like phage baseplate hub + tail lysozyme | Gp122 | 164 | Gp127 (99.3%) | 164 | Gp127 (100%)  | 164 | e (96.9%)            | Lysozyme murein hydrolase                                                                  |
| Nudix hydrolase, phage-associated           | Gp123 | 146 | Gp128 (93%)   | 146 | Gp128 (93.1%) | 146 | NudE (97.9%)         | NudE nudix hydrolase                                                                       |
| Phage protein                               | Gp124 | 102 | Gp129 (100%)  | 162 | Gp129 (87.6%) | 162 | e.2 (96%)            | e.2 conserved hypothetical, predicted membrane protein                                     |
| Phage protein                               | Gp125 | 120 | Gp130 (90.8%) | 120 | Gp130 (85%)   | 120 | e.3 (87.5%)          | e.3 conserved hypothetical, predicted membrane protein                                     |
| Phage protein                               | Gp126 | 130 | Gp131 (96.3%) | 82  | Gp131 (95.1%) | 82  | e.4 (90.7%)          | e.4 conserved hypothetical, predicted membrane protein                                     |
| Phage protein                               | Gp127 | 200 | Gp132 (97.5%) | 200 | Gp132 (97%)   | 202 | e.5 (96%)            | e.5 conserved hypothetical protein                                                         |
| Phage protein                               | Gp128 | 197 | Gp133 (98.4%) | 197 | Gp133 (98.4%) | 197 | e.6 (100%)           | e.6 conserved hypothetical protein                                                         |

|                                             |       |     |                |     |               |             |                          |                                                                                        |
|---------------------------------------------|-------|-----|----------------|-----|---------------|-------------|--------------------------|----------------------------------------------------------------------------------------|
| Phage protein                               | Gp129 | 110 |                |     |               | e.7 (76.5%) | e.7 hypothetical protein |                                                                                        |
| Phage protein                               | Gp130 | 87  | Gp134 (100%)   | 87  | Gp134 (100%)  | 87          | e.8 (98.8%)              | e.8 conserved hypothetical protein                                                     |
| Phage protein                               |       |     | Gp135          | 187 | Gp135 (100%)  | 187         |                          |                                                                                        |
| Phage protein                               | Gp131 | 157 | Gp136 (97.9%)  | 112 | Gp136 (95.5%) | 157         |                          |                                                                                        |
| Phage-associated homing endonuclease        | Gp132 | 221 |                |     | Gp137 (99.5%) | 221         | SegB (83.7%)             | SegB homing endonuclease                                                               |
| Phage protein                               |       |     | Gp137          | 116 |               |             |                          |                                                                                        |
| Phage protein                               | Gp133 | 95  | Gp138 (96.8%)  | 95  | Gp138 (96.8%) | 95          | Trna.2 (94.7%)           | Trna.2 conserved hypothetical protein                                                  |
| Phage protein                               | Gp134 | 126 | Gp139 (60.4%)  | 132 | Gp139 (61.2%) | 132         | Trna.3 (58%)             | Trna.3 conserved hypothetical protein                                                  |
| Phage protein                               | Gp135 | 61  | Gp140 (100%)   | 61  | Gp140 (100%)  | 61          | Trna.4 (100%)            | Trna.4 conserved hypothetical predicted membrane protein                               |
| Phage protein                               | Gp136 | 95  | Gp142 (53.8%)  | 85  | Gp141 (53.8%) | 77          | IpI (100%)               | IpI internal head protein                                                              |
| hypothetical protein                        |       |     | Gp141          | 77  | Gp142         | 85          |                          |                                                                                        |
| Phage protein                               | Gp137 | 151 | Gp143 (100%)   | 47  | Gp143 (100%)  | 151         | Gp57B (100%)             | gp57B conserved hypothetical protein                                                   |
| Phage tail fiber assembly protein           | Gp138 | 80  | Gp144 (97.3%)  | 76  | Gp144 (97.3%) | 76          | Gp57A (97.5%)            | gp57A chaperone for tail fiber formation                                               |
| Deoxynucleotide monophosphate kinase        | Gp139 | 237 | Gp145 (95.8%)  | 241 | Gp145 (99.5%) | 237         | Gp1 (97.1%)              | gp1 dNMP kinase                                                                        |
| Phage tail completion protein               | Gp140 | 176 | Gp146 (100%)   | 176 | Gp146 (99.4%) | 176         | Gp3 (100%)               | gp3 tail completion and sheath stabilizer protein                                      |
| Phage-associated homing endonuclease        | Gp141 | 219 |                |     |               |             |                          |                                                                                        |
| Phage DNA end protector during packaging    | Gp142 | 275 | Gp147 (98%)    | 274 | Gp147 (98.9%) | 274         | Gp2 (98.9%)              | gp2 DNA end protector protein                                                          |
| Phage head completion protein               | Gp143 | 150 | Gp148 (99.3%)  | 150 | Gp148 (99.3%) | 150         | Gp4 (98.6%)              | gp4 head completion protein                                                            |
| Phage baseplate wedge subunit               | Gp144 | 196 | Gp149 (98.4%)  | 196 | Gp149 (97.9%) | 196         | Gp53 (98.9%)             | gp53 baseplate wedge subunit                                                           |
| T4-like phage baseplate hub + tail lysozyme | Gp145 | 576 | Gp150 (99.4%)  | 575 | Gp150 (99.1%) | 575         | Gp5 (99.1%)              | gp5 baseplate hub subunit and tail lysozyme                                            |
|                                             |       |     |                |     |               |             | RepEB<br>RepEA           | RepEB oriE replication initiation protein<br>RepEA oriE replication initiation protein |
| Phage-associated homing endonuclease        | Gp146 | 288 |                |     |               |             |                          |                                                                                        |
| Phage protein                               | Gp147 | 164 | Gp151 (99.3 %) | 164 | Gp151 (95.1%) | 164         | Gp5.1 (97.5%)            | gp5.1 conserved hypothetical protein                                                   |

|                                                                           |       |      |               |      |               |      |               |                                                                  |
|---------------------------------------------------------------------------|-------|------|---------------|------|---------------|------|---------------|------------------------------------------------------------------|
|                                                                           |       |      |               |      |               |      | SegC<br>Gp5.3 | SegC homing endonuclease<br>gp5.3 conserved hypothetical protein |
| Phospholipase                                                             | Gp148 | 97   | Gp152 (100 %) | 97   | Gp152 (100%)  | 97   | Gp5.4 (100%)  | gp5.4 conserved hypothetical protein                             |
| Phage baseplate wedge subunit (T4-like gp6)                               | Gp149 | 660  | Gp153 (99%)   | 660  | Gp153 (99.2%) | 660  |               |                                                                  |
|                                                                           |       |      |               |      |               |      | Gp6           | gp6 baseplate wedge subunit                                      |
| Phage baseplate wedge subunit                                             | Gp150 | 1032 | Gp154 (98.5%) | 1032 | Gp154 (98.3%) | 1032 | Gp7 (98.2%)   | gp7 baseplate wedge initiator                                    |
| Phage baseplate wedge subunit (T4-like gp8)                               | Gp151 | 334  | Gp155 (98.2%) | 334  | Gp155 (97.9%) | 334  | Gp8 (98.2%)   | gp8 baseplate wedge subunit                                      |
| Phage baseplate wedge tail fiber connector (T4-like gp9)                  | Gp152 | 288  | Gp156 (99.3%) | 288  | Gp156 (97.5%) | 288  | Gp9 (99.6%)   | gp9 baseplate wedge tail fiber connector                         |
| Phage baseplate wedge subunit and tail pin (T4-like gp10)                 | Gp153 | 601  | Gp157 (97.6%) | 601  | Gp157 (98.3%) | 601  | Gp10 (85%)    | gp10 baseplate wedge subunit and tail pin                        |
| Phage baseplate wedge subunit and tail pin (T4-like gp11)                 | Gp154 | 219  | Gp158 (95.8%) | 219  | Gp158 (97.2%) | 219  | Gp11 (68%)    | gp11 baseplate wedge subunit and tail pin                        |
| Phage short tail fiber protein #T4-like phage Gp12                        | Gp155 | 516  | Gp159 (97.8%) | 516  | Gp159 (96.1%) | 516  | Gp12 (63.4%)  | gp12 Short tail fibers                                           |
| Phage neck whiskers (Phage fibrin (wac) protein in fPS-65&90)             | Gp156 | 485  | Gp160 (78.7%) | 485  | Gp160 (78.3%) | 485  | Wac (81.6%)   | Wac fibrin neck whiskers                                         |
| T4-like phage head completion, neck hetero-dimeric protein (T4-like gp13) | Gp157 | 309  | Gp161 (99.3%) | 309  | Gp161 (98.3%) | 309  | Gp13 (98.7%)  | gp13 neck protein                                                |
| Phage-associated homing endonuclease                                      | Gp158 | 270  |               |      |               |      |               |                                                                  |
| T4-like phage head completion, neck hetero-dimeric protein (T4-like gp14) | Gp159 | 256  | Gp162 (99.6%) | 256  | Gp162 (99.2%) | 256  | Gp14 (99.2%)  | gp14 neck protein                                                |

|                                              |       |     |               |     |               |     |                |                                                           |
|----------------------------------------------|-------|-----|---------------|-----|---------------|-----|----------------|-----------------------------------------------------------|
| Proximal tail sheath stabilization protein   | Gp160 | 272 | Gp163 (99.6%) | 272 | Gp163 (99.6%) | 272 | Gp15 (100%)    | gp15 tail sheath stabilizer and completion protein        |
| Phage terminase, small subunit               | Gp161 | 164 | Gp164 (100%)  | 164 | Gp164 (100%)  | 164 | Gp16 (100%)    | gp16 terminase DNA packaging enzyme, small subunit        |
| Phage terminase, large subunit               | Gp162 | 610 | Gp165 (99.3%) | 610 | Gp165 (99%)   | 610 | Gp17 (99%)     | gp17 terminase DNA packaging enzyme, large subunit        |
|                                              |       |     |               |     |               |     | Gp17'A         | gp17'A unknown function                                   |
|                                              |       |     |               |     |               |     | Gp17'B         | gp17'B unknown function                                   |
|                                              |       |     |               |     |               |     | Gp17''         | gp17'' unknown function                                   |
| Phage tail sheath monomer                    | Gp163 | 659 | Gp166 (99%)   | 659 | Gp166 (98.9%) | 659 | Gp18 (98.9%)   | gp18 tail sheath protein                                  |
| Phage tail fibers                            | Gp164 | 163 | Gp167 (100%)  | 163 | Gp167 (100%)  | 163 | Gp19 (100%)    | gp19 tail tube protein                                    |
| Phage portal vertex of the head              | Gp165 | 524 | Gp168 (99.4%) | 524 | Gp168 (99.2%) | 524 | Gp20 (99.4%)   | gp20 portal vertex protein of head                        |
| Phage prohead core protein                   | Gp166 | 79  | Gp169 (100%)  | 79  | Gp169 (100%)  | 79  | Gp67 (97.8%)   | gp67 prohead core protein, precursor to internal peptides |
| Phage capsid and scaffold                    | Gp167 | 141 | Gp170 (100%)  | 141 | Gp170 (100%)  | 141 | Gp68 (100%)    | gp68 prohead core protein                                 |
| Phage prohead assembly (scaffolding) protein | Gp168 | 212 | Gp171 (100%)  | 212 | Gp171 (100%)  | 212 | Gp21 (99.5%)   | gp21 prohead core scaffold protein and protease           |
|                                              |       |     |               |     |               |     | Gp21'          | gp21' prohead core protease alternate start product       |
| Phage prohead assembly (scaffolding) protein | Gp169 | 269 | Gp172 (99.2%) | 269 | Gp172 (99.6%) | 269 | Gp22 (98.8%)   | gp22 prohead core scaffold protein                        |
| Phage major capsid protein                   | Gp170 | 521 | Gp173 (96.7%) | 521 | Gp173 (96.7%) | 521 | Gp23 (99.2%)   | gp23 major head protein                                   |
|                                              |       |     |               |     |               |     | SegD           | SegD homing endonuclease                                  |
| Phage capsid vertex                          | Gp171 | 427 | Gp174 (99%)   | 427 | Gp174 (99.3%) | 427 | Gp24 (99%)     | gp24 head vertex protein                                  |
| RNA ligase, phage-associated                 | Gp172 | 334 | Gp175 (97.3%) | 334 | Gp175 (96.7%) | 334 | RnlB (97.6%)   | RnlB RNA ligase 2                                         |
| Phage protein                                | Gp173 | 92  | Gp176 (94.5%) | 92  | Gp176 (96.7%) | 92  | Gp24.2 (98.9%) | gp24.2 conserved hypothetical protein                     |
| Phage protein                                | Gp174 | 61  | Gp177 (98.1%) | 55  | Gp177 (100%)  | 61  | Gp24.3 (81.9%) | gp24.3 conserved hypothetical protein                     |
| Phage capsid and scaffold                    | Gp175 | 376 | Gp178 (90.4%) | 376 | Gp178 (78.5%) | 472 | Hoc (88.5%)    | Hoc head outer capsid protein                             |
| Inh inhibitor of gp21 prohead protease       | Gp176 | 225 | Gp179 (97.7%) | 226 | Gp179 (99.1%) | 226 | Inh (98.2%)    | Inh inhibitor of prohead protease gp21                    |

|                                                       |       |     |               |     |               |     |                       |                                                                              |
|-------------------------------------------------------|-------|-----|---------------|-----|---------------|-----|-----------------------|------------------------------------------------------------------------------|
| Phage-associated homing endonuclease                  | Gp177 | 205 |               |     |               |     | SegE (98.5%)          | SegE homing endonuclease                                                     |
| DNA helicase, phage-associated                        | Gp178 | 502 | Gp180 (98.4%) | 503 | Gp180 (98.2%) | 503 | UvsW (99%)            | UvsW RNA-DNA and DNA-DNA helicase, ATPase                                    |
| DNA helicase, phage-associated                        | Gp179 | 76  | Gp181 (98.6%) | 76  | Gp181 (97.3%) | 76  | UvsW (98.6%)          | UvsW RNA-DNA and DNA-DNA helicase, ATPase                                    |
| Phage protein                                         | Gp180 | 55  | Gp182 (100%)  | 55  | Gp182 (100%)  | 55  | UvsY.-2 (100%)        | UvsY.-2 conserved hypothetical protein                                       |
| Phage protein                                         | Gp181 | 74  | Gp183 (100%)  | 74  | Gp183 (94.5%) | 74  | UvsY.-1 (100%)        | UvsY.-1 conserved hypothetical protein                                       |
| Single stranded DNA-binding protein, phage-associated | Gp182 | 137 | Gp184 (99.2%) | 137 | Gp184 (100%)  | 137 | UvsY (99.2%)          | UvsY recombination, repair and ssDNA binding protein                         |
| Phage baseplate wedge subunit (T4-like gp25)          | Gp183 | 132 | Gp185 (99.2%) | 132 | Gp185 (100%)  | 132 | Gp25 (99.2%)          | gp25 baseplate wedge subunit                                                 |
| Phage baseplate hub assembly chaperone (T4-like gp26) | Gp184 | 208 | Gp186 (99%)   | 208 | Gp186 (99%)   | 208 | Gp26'<br>Gp26 (99.5%) | gp26' internal in-frame translation initiation<br>gp26 baseplate hub subunit |
| Phage baseplate                                       | Gp185 | 249 | Gp187 (98.3%) | 249 | Gp187 (97.9%) | 249 | Gp51 (95.9%)          | gp51 baseplate hub assembly catalyst                                         |
| Phage baseplate hub subunit                           | Gp186 | 391 | Gp188 (98.9%) | 391 | Gp188 (99.4%) | 391 | Gp27 (99.2%)          | gp27 baseplate hub subunit                                                   |
| Phage baseplate hub                                   | Gp187 | 152 | Gp189 (100%)  | 152 | Gp189 (100%)  | 152 | Gp28 (99.3%)          | gp28 baseplate hub distal subunit                                            |
| Phage baseplate hub                                   | Gp188 | 590 | Gp190 (97.4%) | 590 | Gp190 (98.1%) | 590 | Gp29 (97.1%)          | gp29 baseplate hub subunit, tail length determinator                         |
| Phage baseplate tail tube cap (T4-like gp48)          | Gp189 | 364 | Gp191 (96.7%) | 364 | Gp191 (97.8%) | 364 | Gp48 (98.6%)          | gp48 baseplate tail tube cap                                                 |
| Phage tail assembly                                   | Gp190 | 321 | Gp192 (98.7%) | 321 | Gp192 (100%)  | 321 | Gp54 (97.8%)          | gp54 baseplate tail tube initiator                                           |
| Phage protein                                         | Gp191 | 96  | Gp193 (97.9%) | 96  | Gp193 (94.7%) | 92  | Alt.-3 (98.9%)        | Alt.-3 conserved hypothetical protein                                        |
| RNA polymerase-ADP-ribosyltransferase Alt             | Gp192 | 92  | Gp194 (98.7%) | 685 | Gp194 (100%)  | 92  | Alt.-2 (97%)          | Alt.-2 hypothetical protein                                                  |
| RNA polymerase-ADP-ribosyltransferase Alt             | Gp193 | 682 | Gp195 (96.7%) | 684 | Gp195 (99.8%) | 682 | Alt.-1<br>Alt (98.6%) | Alt.-1 hypothetical protein<br>Alt RNA polymerase ADP-ribosylase             |
| Phage protein                                         | Gp194 | 62  | Gp196 (91.9%) | 62  | Gp196 (91.9%) | 62  | Alt.1 (98.3%)         | Alt.1 conserved hypothetical protein                                         |

|                                                            |       |     |               |     |               |     |                |                                                                |
|------------------------------------------------------------|-------|-----|---------------|-----|---------------|-----|----------------|----------------------------------------------------------------|
| DNA ligase, phage-associated                               | Gp195 | 487 | Gp197 (98.3%) | 487 | Gp197 (99.3%) | 487 | Gp30 (98.7%)   | gp30 DNA ligase                                                |
| Phage protein                                              | Gp196 | 89  | Gp198 (98.8%) | 89  | Gp198 (98.8%) | 89  | Gp30.1 (100%)  | gp30.1 conserved hypothetical protein                          |
| Phage protein                                              | Gp197 | 279 | Gp199 (97.1%) | 278 | Gp199 (99.2%) | 279 | Gp30.2 (97.8%) | gp30.2 conserved hypothetical protein                          |
| Phage protein                                              | Gp198 | 126 | Gp200 (97.1%) | 126 | Gp200 (100%)  | 126 | Gp30.3 (99.2%) | gp30.3 conserved hypothetical protein                          |
| Phage protein                                              |       |     |               |     |               |     | Gp30.3'        | gp30.3' hypothetical protein                                   |
| Phage protein                                              | Gp199 | 68  | Gp201 (89.7%) | 68  | Gp201 (98.5%) | 68  | Gp30.4 (95.5%) | gp30.4 conserved hypothetical protein                          |
| Phage protein                                              | Gp200 | 65  | Gp202 (98.4%) | 65  | Gp202 (100%)  | 65  | Gp30.5 (100%)  | gp30.5 hypothetical protein                                    |
| Phage protein                                              | Gp201 | 95  | Gp203 (100%)  | 95  | Gp203 (100%)  | 95  | Gp30.6 (98.9%) | gp30.6 conserved hypothetical protein                          |
| Phage protein                                              | Gp202 | 121 | Gp204 (98.3%) | 121 | Gp204 (100%)  | 121 | Gp30.7 (98.3%) | gp30.7 conserved hypothetical protein                          |
| Phage protein                                              | Gp203 | 110 | Gp205 (97.2%) | 110 | Gp205 (99%)   | 110 | Gp30.8 (98.1%) | gp30.8 conserved hypothetical protein                          |
| Phage protein                                              | Gp204 | 72  | Gp206 (100%)  | 58  | Gp206 (100%)  | 58  | Gp30.9 (100%)  | gp30.9 conserved hypothetical protein                          |
| Phage rIII lysis inhibitor accessory                       | Gp205 | 82  | Gp207 (100%)  | 82  | Gp207 (100%)  | 82  | rIII (100%)    | rIII lysis inhibition accessory protein, rapid lysis phenotype |
| Phage head assembly chaperone protein                      | Gp206 | 111 | Gp208 (99.1%) | 111 | Gp208 (100%)  | 111 | Gp31 (99.1%)   | gp31 head assembly cochaperone with GroEL                      |
| Phage tail fibers                                          | Gp207 | 102 | Gp209 (99%)   | 102 | Gp209 (100%)  | 102 | Gp31.1 (100%)  | gp31.1 conserved hypothetical protein                          |
| Phage tail fibers                                          | Gp208 | 78  | Gp210 (94.8%) | 78  | Gp210 (94.8%) | 78  | Gp31.2 (98.7%) | gp31.2 hypothetical protein                                    |
| dCMP deaminase                                             | Gp209 | 193 | Gp211 (100%)  | 193 | Gp211 (100%)  | 193 | dCMP (99.4%)   | dCMP deaminase                                                 |
| Phage protein                                              | Gp210 | 112 | Gp212 (97.3%) | 112 | Gp212 (100%)  | 112 | Cd.1 (99.1%)   | Cd.1 hypothetical protein                                      |
| Phage protein                                              | Gp211 | 79  | Gp213 (98.7%) | 78  | Gp213 (97.4%) | 78  | Cd.2 (95.8%)   | Cd.2 conserved hypothetical protein                            |
| Phage protein                                              |       |     |               |     | Gp214         | 175 |                |                                                                |
| Phage protein                                              | Gp212 | 91  | Gp215 (98.9%) | 91  | Gp215 (97.8%) | 91  | Cd.3 (98.9%)   | Cd.3 conserved hypothetical protein                            |
| Phage protein                                              |       |     | Gp216         | 66  | Gp216 (95.4%) | 66  | Cd.4 (96.9%)   | Cd.4 conserved hypothetical protein                            |
| Phage protein                                              |       |     | Gp217         | 65  | Gp217 (95.3%) | 65  | Cd.5 (100%)    | Cd.5 hypothetical protein                                      |
| 3'-phosphatase, 5'-polynucleotide kinase, phage-associated | Gp213 | 302 | Gp218 (93.3%) | 301 | Gp218 (90.3%) | 300 | PseT (97.6%)   | PseT polynucleotide 5'-kinase and 3'-phosphatase               |
| Phage protein                                              | Gp214 | 79  | Gp219 (61.3%) | 106 |               |     |                |                                                                |
| Phage protein                                              | Gp215 | 76  | Gp220 (100%)  | 76  | Gp219 (100%)  | 75  | PseT.1 (100%)  | PseT.1 conserved hypothetical protein                          |
| Phage outer membrane lipoprotein Rz1                       | Gp216 | 99  | Gp221 (100%)  | 99  | Gp220 (100%)  | 99  | PseT.2 (98.9%) | PseT.2 conserved hypothetical protein                          |

|                                                               |       |     |               |     |               |     |                  |                                                          |
|---------------------------------------------------------------|-------|-----|---------------|-----|---------------|-----|------------------|----------------------------------------------------------|
| Phage spanin Rz                                               | Gp217 | 117 | Gp222 (94%)   | 117 | Gp221 (90.6%) | 117 | PseT.3 (90.6%)   | PseT.3 conserved hypothetical predicted membrane protein |
| Phage alc transcription terminator                            | Gp218 | 167 | Gp223 (98.2%) | 167 | Gp222 (98.1%) | 167 | Alc (96.9%)      | Alc inhibitor of host transcription                      |
| RNA ligase, phage-associated #T4-like RnlA                    | Gp219 | 374 | Gp224 (99.4%) | 374 | Gp223 (98.4%) | 374 | RnlA (98.9%)     | RnlA RNA ligase 1 and tail fiber attachment catalyst     |
| Phage endonuclease                                            | Gp220 | 136 | Gp225 (99.2%) | 136 | Gp224 (99.2%) | 136 | DenA (99.2%)     | DenA endonuclease II                                     |
| Ribonucleotide reductase of class Ia (aerobic), beta subunit  | Gp221 | 156 | Gp226 (100%)  | 392 | Gp225 (99.3%) | 392 | NrdB (99.3%)     | NrdB aerobic NDP reductase, small subunit                |
| Phage-associated homing endonuclease                          | Gp222 | 269 |               |     |               |     | I-TevIII (95.5%) | I-TevIII homing endonuclease (defective)                 |
| Ribonucleotide reductase of class Ia (aerobic), beta subunit  | Gp223 | 225 |               |     |               |     | NrdB (86%)       | NrdB aerobic NDP reductase, small subunit                |
|                                                               |       |     |               |     |               |     | Nrd.1            | Nrd.1 hypothetical protein                               |
| Ribonucleotide reductase of class Ia (aerobic), alpha subunit | Gp224 | 329 | Gp227 (99.3%) | 754 | Gp226 (98.4%) | 329 | NrdA (97.3%)     | NrdA aerobic NDP reductase, large subunit                |
| Phage-associated homing endonuclease                          | Gp225 | 236 |               |     | Gp227 (99.5%) | 236 | MobE (45.3%)     | MobE homing endonuclease                                 |
| Ribonucleotide reductase of class Ia (aerobic), alpha subunit | Gp226 | 477 |               |     | Gp228 (99.7%) | 477 | NrdA (99.7%)     | NrdA aerobic NDP reductase, large subunit                |
| undefined product                                             |       |     |               |     | Gp229         | 108 | NrdA.1 (96.3%)   | NrdA.1 conserved hypothetical protein                    |
| Phage protein                                                 | Gp227 | 87  | Gp228 (95.4%) | 87  | Gp230 (94.2%) | 87  | NrdA.2 (96.5%)   | NrdA.2 conserved hypothetical protein                    |
| Thymidylate synthase                                          | Gp228 | 104 | Gp229 (71.4%) | 104 | Gp231 (100%)  | 104 | dTMP (74%)       | dTMP (thymidylate) synthase                              |
| Phage-associated homing endonuclease                          | Gp229 | 245 | Gp230 (99.1%) | 245 | Gp232 (99.5%) | 245 | I-TevI (99.5%)   | I-TevI homing endonuclease                               |
| Thymidylate synthase                                          | Gp230 | 183 | Gp231 (92.9%) | 183 | Gp233 (93.4%) | 183 | dTMP (90.7%)     | dTMP (thymidylate) synthase                              |
| hypothetical protein                                          | Gp231 | 68  | Gp232 (98.5%) | 68  | Gp234 (98.5%) | 68  |                  |                                                          |
| Dihydrofolate reductase, phage-associated                     | Gp232 | 193 | Gp233 (98.9%) | 193 | Gp235 (98.4%) | 193 | Frd (97.9%)      | Frd dihydrofolate reductase                              |
| Phage protein                                                 | Gp233 | 81  | Gp234 (98.7%) | 81  | Gp236 (100%)  | 81  |                  |                                                          |
| Phage protein                                                 | Gp234 | 41  | Gp235 (100%)  | 80  | Gp237 (100%)  | 80  | Frd.1 (100%)     | Frd.1 conserved hypothetical protein                     |



|                                                                                           |       |      |               |      |               |      |                      |                                                                                       |
|-------------------------------------------------------------------------------------------|-------|------|---------------|------|---------------|------|----------------------|---------------------------------------------------------------------------------------|
| Phage protein                                                                             | Gp235 | 126  | Gp236 (64.3%) | 128  | Gp238 (40.9%) | 128  | Frd.2 (65.1%)        | Frd.2 conserved hypothetical protein                                                  |
| Phage protein                                                                             | Gp236 | 75   | Gp237 (90.6%) | 75   | Gp239 (81.5%) | 76   | Frd.3 (94.6%)        | Frd.3 hypothetical protein                                                            |
| Single stranded DNA-binding protein, phage-associated                                     | Gp237 | 302  | Gp238 (98%)   | 302  | Gp240 (98.3%) | 302  | Gp32 (98%)           | gp32 single-stranded DNA binding protein                                              |
| Phage DNA helicase loader                                                                 | Gp238 | 217  | Gp239 (100%)  | 212  | Gp241 (100%)  | 217  | SegG<br>Gp59 (100%)  | SegG homing endonuclease<br>gp59 loader of gp41 DNA helicase                          |
| Transcriptional regulator                                                                 | Gp239 | 112  | Gp240 (100%)  | 112  | Gp242 (100%)  | 112  | Gp33 (100%)          | gp33 late promoter transcription accessory protein                                    |
| Phage double-stranded DNA binding protein #T4- like dsbA, late transcriptional regulation | Gp240 | 89   | Gp241 (100%)  | 89   | Gp243 (100%)  | 89   | DsbA (100%)          | dsDNA binding protein, late transcription                                             |
| Phage ribonuclease H                                                                      | Gp241 | 305  | Gp242 (99%)   | 305  | Gp244 (99%)   | 305  | Gprnh (99%)          | RNaseH ribonuclease                                                                   |
| Phage long tail fiber proximal subunit                                                    | Gp242 | 1290 | Gp243 (93.3%) | 1289 | Gp245 (93.2%) | 1290 | Gp34 (93.8%)         | gp34 long tail fiber, proximal subunit                                                |
| Phage tail connector protein                                                              | Gp243 | 372  | Gp244 (94.8%) | 371  | Gp246 (95.4%) | 371  | Gp35 (94.8%)         | gp35 hinge connector of long tail fiber, proximal connector                           |
| Phage tail fibers (Phage tail connector protein in fPS-65&90)                             | Gp244 | 218  | Gp245 (60.7%) | 216  | Gp247 (67.6%) | 229  | Gp36 (80.5%)         | gp36 hinge connector of long tail fiber, distal connector                             |
| Phage tail fibers                                                                         | Gp245 | 1018 | Gp246 (65.2%) | 994  | Gp248 (74.1%) | 988  | Gp37 (34.5%)<br>Gp38 | gp37 long tail fiber, distal subunit<br>gp38 distal long tail fiber assembly catalyst |
| Phage tail fibers                                                                         | Gp246 | 259  | Gp247 (69%)   | 260  | Gp249 (95.7%) | 259  |                      |                                                                                       |
| Phage holin                                                                               | Gp247 | 218  | Gp248 (97.7%) | 218  | Gp250 (97.2%) | 246  | T                    | holin lysis mediator                                                                  |
| Phage anti-sigma factor                                                                   | Gp248 | 90   | Gp249 (98.8%) | 90   | Gp251 (100%)  | 90   | AsiA (100%)          | AsiA anti-sigma 70 protein                                                            |
| Phage anti-sigma factor                                                                   | Gp249 | 50   | Gp250 (93%)   | 44   | Gp252 (100%)  | 50   | AsiA.1 (96%)         | AsiA.1 hypothetical protein                                                           |
| Phage anti-restriction nuclease                                                           | Gp250 | 92   | Gp251 (96.7%) | 92   | Gp253 (98.9%) | 92   | Arn (97.8%)          | Arn inhibitor of MrcBC restriction endonuclease (anti-restriction nuclease)           |
| Phage protein                                                                             | Gp251 | 39   | Gp252 (97.4%) | 39   | Gp254 (97.4%) | 39   |                      |                                                                                       |
| Phage anti-restriction nuclease                                                           | Gp252 | 43   | Gp253 (97.6%) | 43   | Gp255 (97.6%) | 43   | Arn.1 (95.3%)        | Arn.1 conserved hypothetical protein                                                  |
| Phage anti-restriction nuclease                                                           | Gp253 | 98   | Gp254 (96.9%) | 98   | Gp256 (98.9%) | 98   | Arn.2 (98.9%)        | Arn.2 conserved hypothetical protein                                                  |

|                                                     |       |     |               |     |               |     |                |                                                               |
|-----------------------------------------------------|-------|-----|---------------|-----|---------------|-----|----------------|---------------------------------------------------------------|
| Phage anti-restriction nuclease                     | Gp254 | 152 | Gp255 (82.3%) | 153 | Gp257 (96.7%) | 153 | Arn.3 (98%)    | Arn.3 conserved hypothetical protein                          |
| Phage anti-restriction nuclease                     | Gp255 | 109 | Gp256 (99%)   | 109 | Gp258 (100%)  | 109 | Arn.4 (100%)   | Arn.4 conserved hypothetical protein                          |
| Phage transcriptional regulator of middle promoters | Gp256 | 211 | Gp257 (99.5%) | 211 | Gp259 (98.5%) | 211 | MotA (97.6%)   | MotA activator of middle period transcription                 |
| Transcriptional regulator                           | Gp257 | 49  | Gp258 (91.8%) | 49  | Gp260 (100%)  | 49  | MotA.1 (97.9%) | MotA.1 hypothetical predicted periplasmic protein             |
| DNA topoisomerase, phage-associated                 | Gp258 | 442 | Gp259 (98.6%) | 442 | Gp261 (99.3%) | 442 | Gp52 (99.5%)   | gp52 topoisomerase II, medium subunit                         |
| undefined product                                   |       |     |               |     | Gp262         | 52  | Gp52.1         | gp52.1 conserved hypothetical predicted membrane protein      |
|                                                     |       |     |               |     |               |     | Ac (97%)       | Ac acridine resistance protein                                |
|                                                     |       |     |               |     |               |     | Stp            | Stp activator of host PrrC lysyl-tRNA endonuclease            |
| Phage protein                                       | Gp259 | 152 | Gp260 (97.3%) | 152 | Gp263 (97.3%) | 152 | Ndd (96.7%)    | Ndd nucleoid disruption protein                               |
| Phage protein                                       | Gp260 | 71  | Gp261 (98.5%) | 71  | Gp264 (95.7%) | 71  | Ndd.1 (97.1%)  | Ndd.1 conserved hypothetical protein                          |
| Phage protein                                       | Gp261 | 41  | Gp262 (92.6%) | 41  | Gp265 (90.2%) | 41  | Ndd.2 (88.8%)  | Ndd.2 hypothetical predicted outer membrane protein           |
| Phage protein                                       | Gp262 | 65  | Gp263 (96.9%) | 65  | Gp266 (100%)  | 65  | Ndd.2a (95%)   | Ndd.2a hypothetical predicted periplasmic protein             |
|                                                     |       |     |               |     |               |     | Ndd.3          | Ndd.3 hypothetical predicted inner membrane protein           |
|                                                     |       |     |               |     |               |     | Ndd.4          | Ndd.4 hypothetical predicted inner membrane                   |
|                                                     |       |     |               |     |               |     | Ndd.5          | Ndd.5 hypothetical predicted outer membrane protein           |
|                                                     |       |     |               |     |               |     | Ndd.6          | Ndd.6 conserved hypothetical predicted outer membrane protein |
|                                                     |       |     |               |     |               |     |                |                                                               |
| hypothetical protein                                | Gp263 | 37  | Gp264 (94.5%) | 37  | Gp267 (94.5%) | 37  | Inh (46.6%)    | Inh inhibitor of prohead protease gp21                        |
| Phage protein                                       | Gp264 | 87  | Gp265 (56.3%) | 87  | Gp268 (97.7%) | 87  |                |                                                               |
| Phage endonuclease                                  | Gp265 | 185 | Gp266 (97.3%) | 185 | Gp269 (98.3%) | 185 | DenB (99.4%)   | DenB DNA endonuclease IV                                      |
| putative protein                                    | Gp266 | 64  | Gp267 (95.3%) | 64  | Gp270 (100%)  | 64  | DenB.1 (96.8%) | DenB.1 hypothetical protein                                   |
| Phage rIIB lysis inhibitor                          | Gp267 | 312 | Gp268 (97.4%) | 312 | Gp271 (97.7%) | 312 | rIIB (98%)     | rIIB protector from prophage-induced early lysis              |

## Supplementary Figures

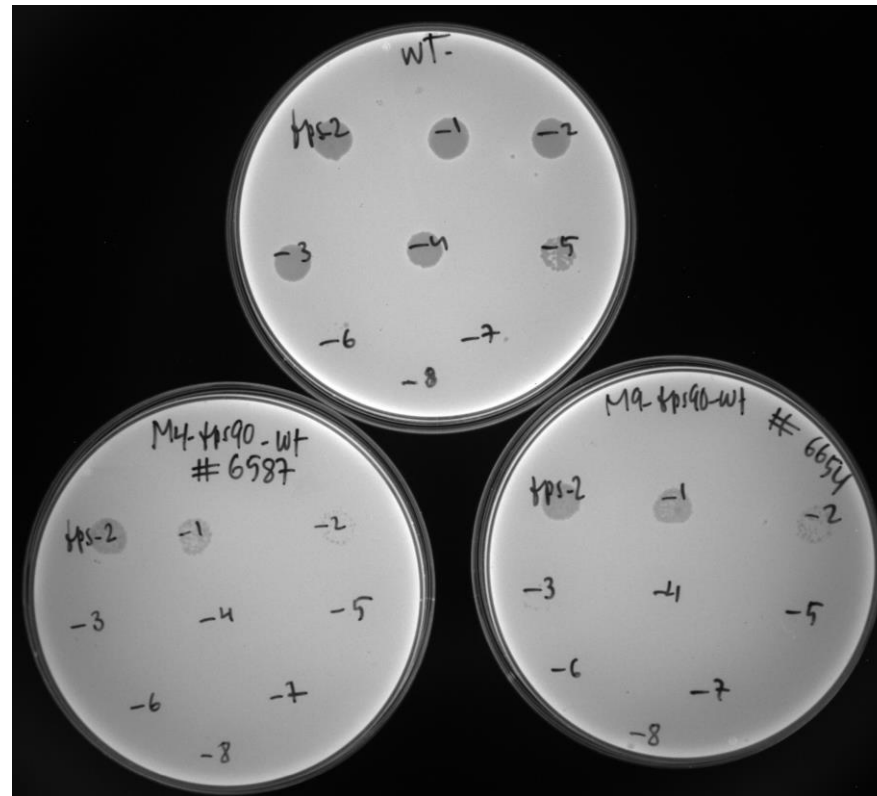

**Figure S1.** The EOP test of fPS-2 with M4-fps90-wt and M9-fps90-wt strains to determine whether the OmpF protein is required by fPS-2 for full infection. As seen in the plates, there is about 4 logs reduction in the EOP of the phage on the mutant strains compared to the wild-type strain, suggesting that the OmpF is required by fPS-2 for full infection.

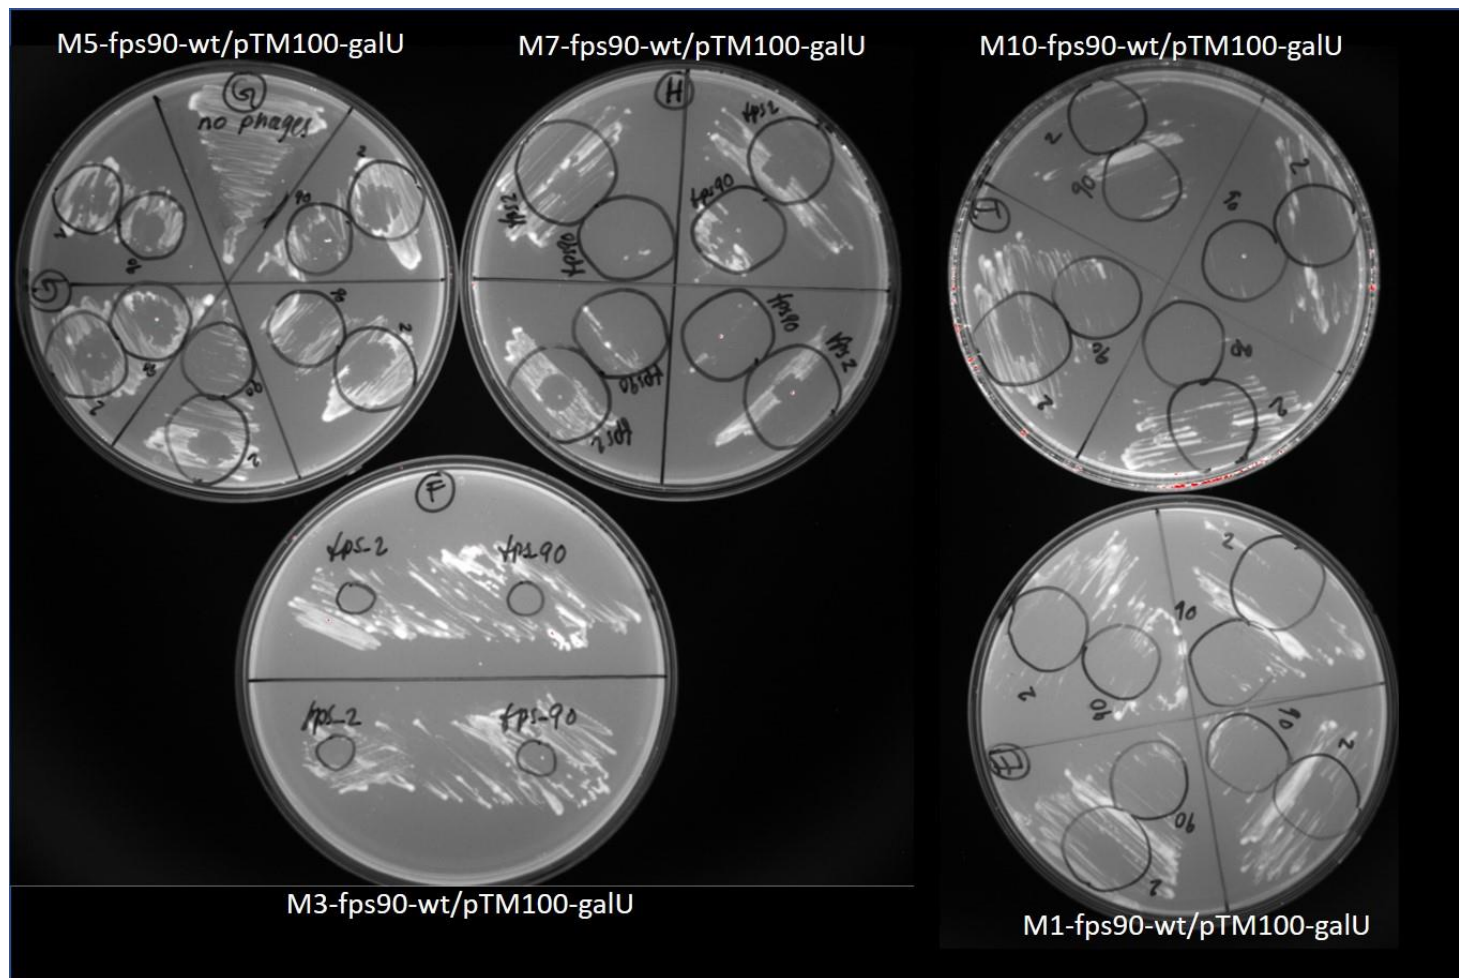

**Figure S2.** Spot assay to test the sensitivity of the *galU*-complemented spontaneous phage-resistant mutant strains to fPS-2 and fPS-90. The complemented strains are M1-90/galU, M3-90/galU, M5-90/galU, M7-90/galU and M10-90/galU were abbreviated on the plates as E, F, G, H and I, respectively. The lysis on the bacterial lawn indicated that the complemented strains have retained their sensitivity to the phages when complemented with the wild *galU* gene.

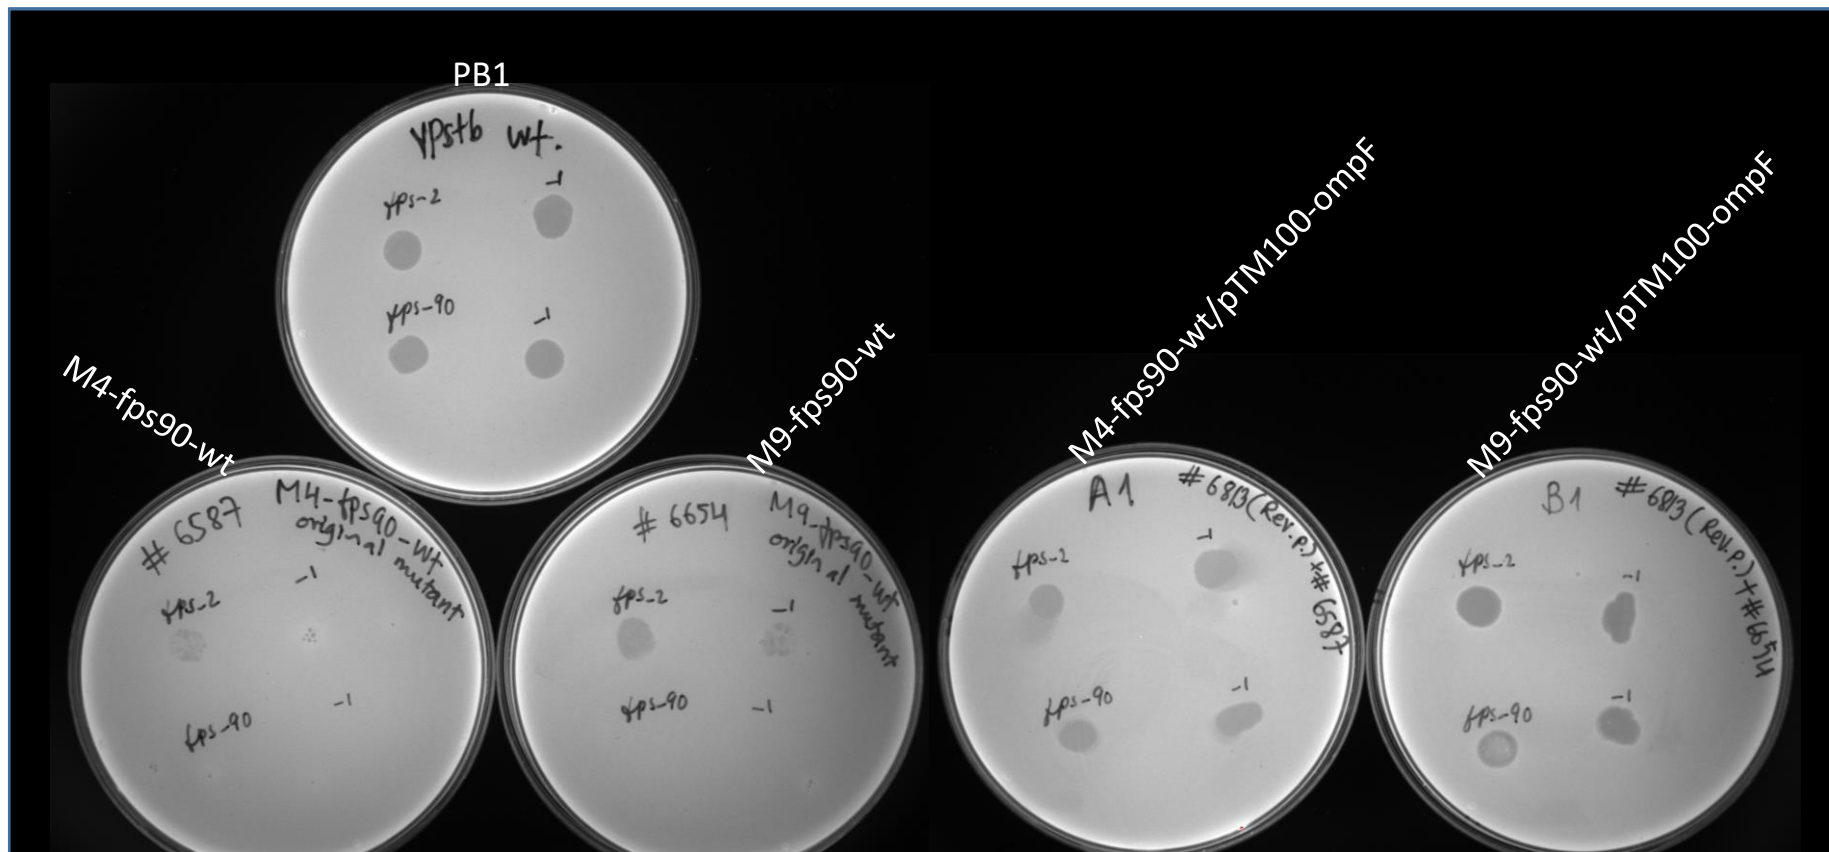

**Figure S3.** The complementation of the phage-resistant mutant strains M4-fps90-wt and M9-fps90-wt with the plasmid pTM100-ompF carrying the intact *ompF* gene of *Y. pseudotuberculosis* strain PB1. Ten  $\mu$ l drops of undiluted and 1:10 diluted stocks of the phages fPS-2 and fPS-90 were pipetted on soft-agar plates containing the indicated strains. PB1 is the wild type parental *Y. pseudotuberculosis* strain PB1. The results demonstrate that phage fPS-90 could infect and lyse both the complemented strains indicating that the intact *ompF* gene was able to complement *in trans* both of the strains. Note also that the complemented strains were more efficiently infected by fPS-2.

## References

1. Burrows, T.W.; Bacon, G.A. V and W antigens in strains of *Pasteurella pseudotuberculosis*. *Br. J. Exp. Pathol.* **1960**, *41*, 38-44.
2. Skurnik, M. Lack of correlation between the presence of plasmids and fimbriae in *Yersinia enterocolitica* and *Yersinia pseudotuberculosis*. *J. Appl. Bact.* **1984**, *56*, 355-363.
3. Bölin, I.; Norlander, L.; Wolf-Watz, H. Temperature-inducible outer membrane protein of *Yersinia pseudotuberculosis* and *Yersinia enterocolitica* is associated with the virulence plasmid. *Infect. Immun.* **1982**, *37*, 506-512.
4. Kiljunen, S.; Datta, N.; Dentovskaya, S.V.; Anisimov, A.P.; Knirel, Y.A.; Bengoechea, J.A.; Holst, O.; Skurnik, M. Identification of the lipopolysaccharide core of *Yersinia pestis* and *Yersinia pseudotuberculosis* as the receptor for bacteriophage fA1122. *J. Bacteriol.* **2011**, *193*, 4963-4972.
5. Kenyon, J.J.; Duda, K.A.; De Felice, A.; Cunneen, M.M.; Molinaro, A.; Laitinen, J.; Skurnik, M.; Holst, O.; Reeves, P.R.; De Castro, C. Serotype O:8 isolates in the *Yersinia pseudotuberculosis* complex have different O-antigen gene clusters and produce various forms of rough LPS. *Innate Immun.* **2016**, *22*, 205-217.
6. Tsubokura, M.; Aleksic, S. A simplified antigenic scheme for serotyping of *Yersinia pseudotuberculosis*: Phenotypic characterization of reference strains and preparation of O and H factor sera. *Contrib. Microb. Immunol.* **1995**, *13*, 99-105.
7. Kondakova, A.N.; Sevillano, A.M.; Shaikhutdinova, R.Z.; Lindner, B.; Komandrova, N.A.; Dentovskaya, S.V.; Shashkov, A.S.; Anisimov, A.P.; Skurnik, M.; Knirel, Y.A. Revision of the O-polysaccharide structure of *Yersinia pseudotuberculosis* O:1a; confirmation of the function of WbyM as paratransferase. *Carbohydr. Res.* **2012**, *350*, 98-102.
8. Laukkanen-Ninios, R.; Didelot, X.; Jolley, K.A.; Morelli, G.; Sangal, V.; Kristo, P.; Brehony, C.; Imori, P.F.; Fukushima, H.; Siitonen, A., *et al.* Population structure of the *Yersinia pseudotuberculosis* complex according to multilocus sequence typing. *Environ Microbiol* **2011**, *13*, 3114-3127.
9. Ben-Gurion, R.; Hertman, I. Bacteriocin-like material produced by *Pasteurella pestis*. *J. Gen. Microbiol.* **1958**, *19*, 289-297.
10. Portnoy, D.A.; Falkow, S. Virulence-associated plasmids from *Yersinia enterocolitica* and *Yersinia pestis*. *J. Bacteriol.* **1981**, *148*, 877-883.
11. Garcia, E.; Nedialkov, Y.A.; Elliott, J.; Motin, V.L.; Brubaker, R.R. Molecular characterization of KatY (antigen 5), a thermoregulated chromosomally encoded catalase-peroxidase of *Yersinia pestis*. *J. Bacteriol.* **1999**, *181*, 3114-3122.
12. Korhonen, T.K.; Väisänen, V.; Saxén, H.; Hultberg, H.; Svenson, S.B. P-Antigen-Recognizing Fimbriae from Human Urupathogenic *Escherichia coli* Strains. *Infect. Immun.* **1982**, *37*, 286-291.
13. Grant, S.G.; Jessee, J.; Bloom, F.R.; Hanahan, D. Differential plasmid rescue from transgenic mouse DNAs into *Escherichia coli* methylation-restriction mutants. *Proc. Natl. Acad. Sci. USA* **1990**, *87*, 4645-4649.
14. Figurski, D.H.; Helinski, D.R. Replication of an origin-containing derivative of plasmid RK2 dependent on a plasmid function provided in trans. *Proc. Natl. Acad. Sci. USA* **1979**, *76*, 1648-1652.
15. Babic, A.; Guerout, A.M.; Mazel, D. Construction of an improved RP4 (RK2)-based conjugative system. *Res. Microbiol.* **2008**, *159*, 545-549.
16. Wang, Q.; Torzewska, A.; Ruan, X.; Wang, X.; Rozalski, A.; Shao, Z.; Guo, X.; Zhou, H.; Feng, L.; Wang, L. Molecular and genetic analyses of the putative *Proteus* O antigen gene locus. *Appl. Environ. Microb.* **2010**, *76*, 5471-5478.
17. Mayer, H.; Schmidt, G. Chemistry and biology of the enterobacterial common antigen (ECA). *Curr. Top. Microbiol. Immunol.* **1979**, *85*, 99-153.

18. Noszczyńska, M.; Kasperkiewicz, K.; Duda, K.A.; Podhorodecka, J.; Rabsztyn, K.; Gwizdala, K.; Swierzek, A.S.; Radziejewska-Lebrecht, J.; Holst, O.; Skurnik, M. Serological characterization of the enterobacterial common antigen substitution of the lipopolysaccharide of *Yersinia enterocolitica* O : 3. *Microbiology* **2015**, *161*, 219-227.
