# Supplementary material for: T4-like Bacteriophages Isolated from Pig Stools Infect Yersinia pseudotuberculosis and Yersinia pestis Using LPS and OmpF as Receptors
Source: PubMed Central journal article supplement (PMC7917993; doi:10.3390/v13020296), 2021-02-13
Supplement: viruses-13-00296-s001.pdf [file viruses-13-00296-s001.pdf]

# Supplementary Material: Understanding the Salt-Dependent Outcome of Glycine Polymorphic Nucleation

Guangjun Han, Pui Shan Chow and Reginald B.H. Tan

## Supplementary Materials—Properties and PXRDs of $\alpha$ -, $\beta$ - and $\gamma$ -glycine polymorphs

### 1. Properties of $\alpha$ -, $\beta$ - and $\gamma$ -glycine polymorphs

Some of the properties of the three glycine polymorphs are summarized in Table S1.

**Table S1.** Properties of  $\alpha$ -,  $\beta$ - and  $\gamma$ -glycine crystals.

| Property                                                                                            | $\alpha$ -Glycine  | $\beta$ -Glycine | $\gamma$ -Glycine                  |
|-----------------------------------------------------------------------------------------------------|--------------------|------------------|------------------------------------|
| space group [1]                                                                                     | P2 <sub>1</sub> /n | P2 <sub>1</sub>  | P3 <sub>1</sub> or P3 <sub>2</sub> |
| Z (formula units per cell) [1]                                                                      | 4                  | 2                | 3                                  |
| unit cell volume (Å <sup>3</sup> ) [1]                                                              | 309.6              | 157.3            | 235.1                              |
| solubility in pure water at 298.15 K (g/(100g water)) [2]                                           | 25.03              | NA               | 23.49                              |
| solution enthalpy $\Delta_{\text{sol}}H_{\text{m}}$ (J mol <sup>-1</sup> ) [3]                      | 14,523 $\pm$ 76    | 14,198 $\pm$ 73  | 14,791 $\pm$ 84                    |
| sublimation enthalpy $\Delta H_{\text{sub}}$ at 298.15 K (J mol <sup>-1</sup> K <sup>-1</sup> ) [4] | 140.58             | 138.09           | 141.70                             |
| isobaric heat capacity $C_p$ at 298.15 K (J mol <sup>-1</sup> K <sup>-1</sup> ) [4]                 | 89.85              | 90.46            | 89.78                              |

### 2. PXRD patterns and analyses of glycine polymorphs

The simulated PXRD patterns of  $\alpha$ -,  $\beta$ - and  $\gamma$ -glycine references are shown in Figure S1-a. Note that Materials Studio's CSD codes of Gly29 ( $\alpha$ -form), Gly33 ( $\gamma$ -form) and Gly31 ( $\beta$ -form) were used in PXRD simulation. As an illustration of solid phase analyses, the PXRD patterns of  $\alpha$ -glycine crystal samples before and after the test of  $\alpha$ -glycine solubility in a glycine aqueous solution in the presence of 1m Na<sub>2</sub>SO<sub>4</sub> are presented in Figures S1-b. Similarly, the PXRD patterns of  $\gamma$ -glycine crystal samples before and after the test of  $\gamma$ -glycine solubility in a glycine aqueous solution in the presence of 1m Na<sub>2</sub>SO<sub>4</sub> are presented in Figures S1-c.

Comparing the PXRD patterns (Figure S1-b) of  $\alpha$ -glycine crystal samples with those (Figure S1-a) of  $\alpha$ -,  $\beta$ - and  $\gamma$ -glycine references reveals that the metastable  $\alpha$ -glycine crystals remained unchanged in their polymorph before and after  $\alpha$ -glycine solubility test through an isothermal method. In a similarly way, comparing the PXRD patterns (Figures S1-a and S1-c) enables us to conclude that the thermodynamically stable  $\gamma$ -glycine crystals (Figure S1-c) also remained unchanged in their polymorph before and after  $\gamma$ -glycine solubility test, which is well expected.

**Citation:** Han, G.; Chow, P.S.; Tan, R.B.H. Understanding the Salt-Dependent Outcome of Glycine Polymorphic Nucleation. *Pharmaceutics* **2021**, *13*

**Publisher's Note:** MDPI stays neutral with regard to jurisdictional claims in published maps and institutional affiliations.

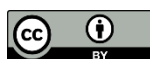

**Copyright:** © 2021 by the authors. Submitted for possible open access publication under the terms and conditions of the Creative Commons Attribution (CC BY) license (<http://creativecommons.org/licenses/by/4.0/>).

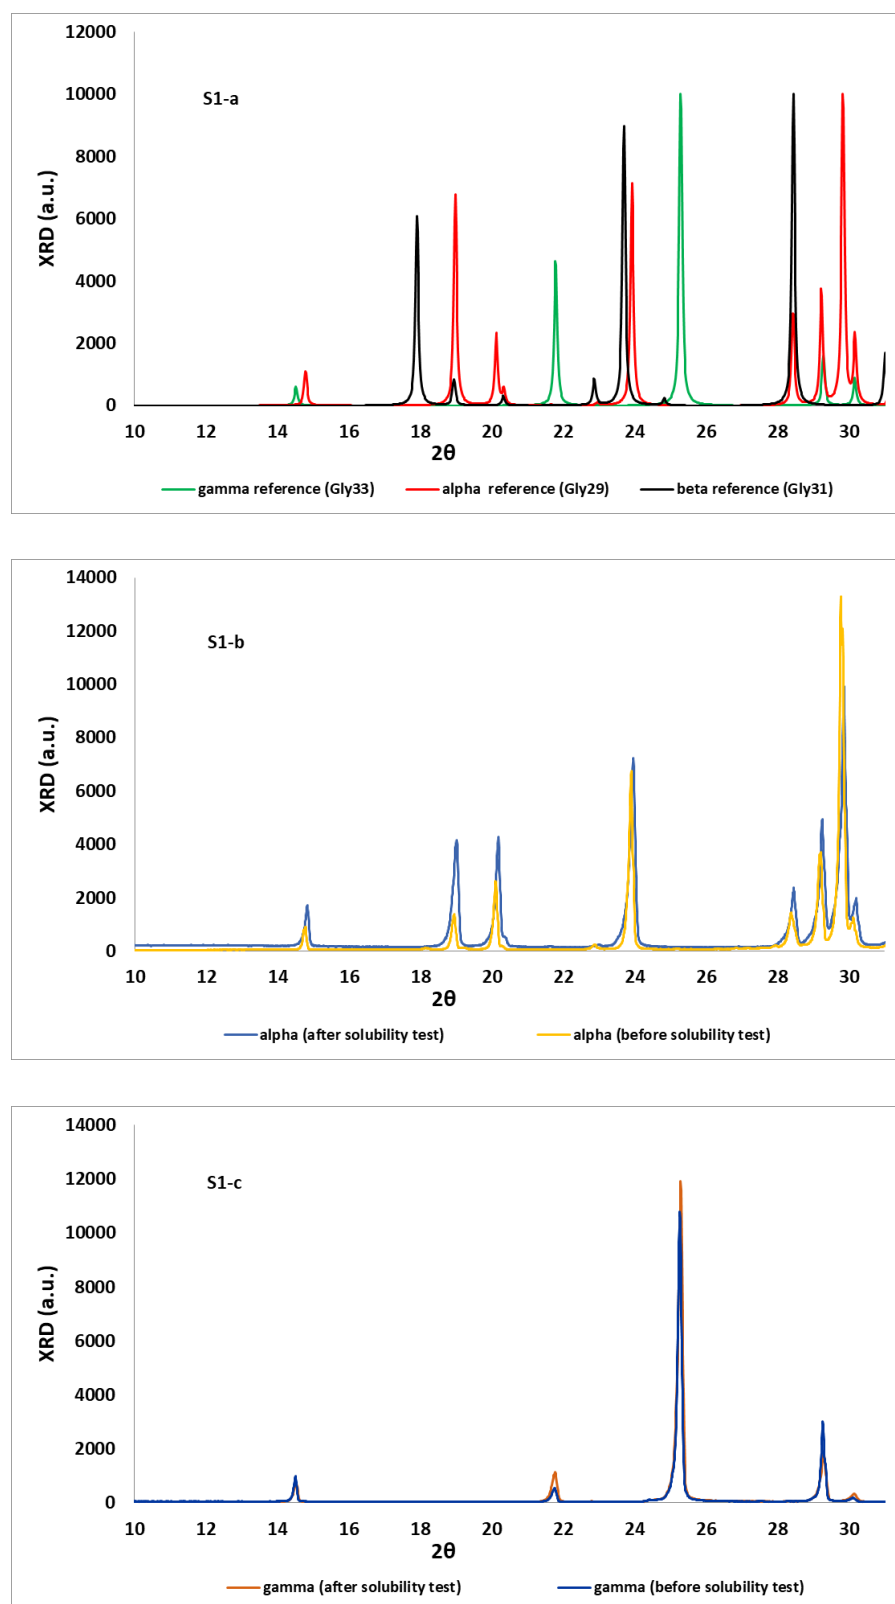

**Figure S1.** PXRD patterns of  $\alpha$ -,  $\beta$ - and  $\gamma$ -glycine references (S1-a),  $\alpha$ -glycine crystal samples (S1-b) before and after the  $\alpha$ -glycine solubility test, and  $\gamma$ -glycine crystal samples (S1-c) before and after the  $\gamma$ -glycine solubility test.

---

## References

1. Iitaka, Y. The crystal structure of  $\beta$ -glycine. *Acta Cryst.* **1960**, *13*, 35–45.
2. Han, G.; Chow, P.S.; Tan, R.B.H. Understanding the Salt-Dependent Outcome of Glycine Polymorphic Nucleation. *Pharmaceutics* **2021**, *13*, 262.
3. Xavier, N.F.; Silva, A.M.; Bauerfeldt, G.F. What Rules the Relative Stability of  $\alpha$ -,  $\beta$ -, and  $\gamma$ -Glycine Polymorphs? *Cryst. Growth Des.* **2020**, *20*, 4695–4706.
4. Perlovich, G.L.; Hansen, L.K.; Bauer-Brandl, A. The polymorphism of glycine: Thermochemical and structural aspects. *J. Therm. Anal. Calorim.* **2001**, *66*, 699–715.
